# Supplementary material for: “Extensive Transmission of Microbes along the Gastrointestinal Tract”
Source: bioRxiv preprint, doi:10.1101/507194, version 1 (2018-12-28)
Supplement: Table S1 [file 507194_file15.xlsx]

## Sheet: Sheet1
	subject	family	extraction	cohort	material	body_site	timepoint	group	sex	age	bmi	replace_specI	BioSample_accession	read_depth
CT1_OR	Zhang_RA.C1	FAM.Zhang_RA.C1	BGI	Zhang-RA	saliva	oral	0	control	F	49	25.6	SAMEA2738025	SAMEA2738024,SAMEA2738025	16163684
SAMEA2737770	Zhang_RA.C1	FAM.Zhang_RA.C1	BGI	Zhang-RA	stool	gut	0	control	F	49	25.5983		SAMEA2737770	61423104
CT10_OR	Zhang_RA.C10	FAM.Zhang_RA.C10	BGI	Zhang-RA	saliva	oral	0	control	F	68	27.2	SAMEA2738027	SAMEA2738026,SAMEA2738027	13589734
SAMEA2737863	Zhang_RA.C10	FAM.Zhang_RA.C10	BGI	Zhang-RA	stool	gut	0	control	F	68	27.2392		SAMEA2737863	69819088
SAMEA2738135	Zhang_RA.C104_R	FAM.Zhang_RA.C104	BGI	Zhang-RA	saliva	oral	0	control	F	40	22.0317		SAMEA2738135	56063268
SAMEA2737681	Zhang_RA.C104_R	FAM.Zhang_RA.C104	BGI	Zhang-RA	stool	gut	0	control	F	40	22.0317		SAMEA2737681	60064360
SAMEA2737855	Zhang_RA.C11	FAM.Zhang_RA.C11	BGI	Zhang-RA	stool	gut	0	control	M	37	28.3848		SAMEA2737855	75233606
CT12_OR	Zhang_RA.C12	FAM.Zhang_RA.C12	BGI	Zhang-RA	saliva	oral	0	control	M	52	20	SAMEA2738029	SAMEA2738028,SAMEA2738029	16583432
SAMEA2737825	Zhang_RA.C12	FAM.Zhang_RA.C12	BGI	Zhang-RA	stool	gut	0	control	M	52	20.0474		SAMEA2737825	71482694
SAMEA2737705	Zhang_RA.C122_S	FAM.Zhang_RA.C122	BGI	Zhang-RA	stool	gut	0	control	F	57	26.2336		SAMEA2737705	73297002
SAMEA2737707	Zhang_RA.C124_R	FAM.Zhang_RA.C124	BGI	Zhang-RA	stool	gut	0	control	F	36	19.3337		SAMEA2737707	61593814
SAMEA2738151	Zhang_RA.C126_S	FAM.Zhang_RA.C126	BGI	Zhang-RA	saliva	oral	0	control	F	53	32.8731		SAMEA2738151	59235838
SAMEA2737709	Zhang_RA.C126_S	FAM.Zhang_RA.C126	BGI	Zhang-RA	stool	gut	0	control	F	53	32.8731		SAMEA2737709	58068006
CT13_OR	Zhang_RA.C13	FAM.Zhang_RA.C13	BGI	Zhang-RA	saliva	oral	0	control	F	46	21.4	SAMEA2738031	SAMEA2738030,SAMEA2738031	10973742
SAMEA2737823	Zhang_RA.C13	FAM.Zhang_RA.C13	BGI	Zhang-RA	stool	gut	0	control	F	46	21.3675		SAMEA2737823	62392402
SAMEA2738153	Zhang_RA.C130_S	FAM.Zhang_RA.C130	BGI	Zhang-RA	saliva	oral	0	control	F	55	26.0375		SAMEA2738153	56857906
SAMEA2737711	Zhang_RA.C130_S	FAM.Zhang_RA.C130	BGI	Zhang-RA	stool	gut	0	control	F	55	26.0375		SAMEA2737711	57533064
CT14_OR	Zhang_RA.C14	FAM.Zhang_RA.C14	BGI	Zhang-RA	saliva	oral	0	control	F	42	25.4	SAMEA2738033	SAMEA2738032,SAMEA2738033	11761822
SAMEA2737812	Zhang_RA.C14	FAM.Zhang_RA.C14	BGI	Zhang-RA	stool	gut	0	control	F	42	25.4028		SAMEA2737812	66058264
SAMEA2738159	Zhang_RA.C145_R	FAM.Zhang_RA.C145	BGI	Zhang-RA	saliva	oral	0	control	F	26	27.3438		SAMEA2738159	51229296
SAMEA2737716	Zhang_RA.C145_R	FAM.Zhang_RA.C145	BGI	Zhang-RA	stool	gut	0	control	F	26	27.3438		SAMEA2737716	65653170
SAMEA2738162	Zhang_RA.C147_R	FAM.Zhang_RA.C147	BGI	Zhang-RA	saliva	oral	0	control	F	36	27.3438		SAMEA2738162	49265294
SAMEA2737719	Zhang_RA.C147_R	FAM.Zhang_RA.C147	BGI	Zhang-RA	stool	gut	0	control	F	36	27.3438		SAMEA2737719	59708870
SAMEA2737692	Zhang_RA.C15_S	FAM.Zhang_RA.C15	BGI	Zhang-RA	stool	gut	0	control	M	46	26.7036		SAMEA2737692	46717232
SAMEA2738163	Zhang_RA.C150_R	FAM.Zhang_RA.C150	BGI	Zhang-RA	saliva	oral	0	control	M	26	18.8776		SAMEA2738163	12244364
SAMEA2737720	Zhang_RA.C150_R	FAM.Zhang_RA.C150	BGI	Zhang-RA	stool	gut	0	control	M	26	18.8776		SAMEA2737720	62378556
SAMEA2737844	Zhang_RA.C155_R	FAM.Zhang_RA.C155	BGI	Zhang-RA	stool	gut	0	control	F	25	19.5312		SAMEA2737844	77485390
CT15H_OR	Zhang_RA.C15H	FAM.Zhang_RA.C15H	BGI	Zhang-RA	saliva	oral	0	control	F	53	25.8	SAMEA2738035	SAMEA2738034,SAMEA2738035	7032508
SAMEA2737840	Zhang_RA.C15H	FAM.Zhang_RA.C15H	BGI	Zhang-RA	stool	gut	0	control	F	53	25.7657		SAMEA2737840	84344218
SAMEA2737766	Zhang_RA.C161_S	FAM.Zhang_RA.C161	BGI	Zhang-RA	stool	gut	0	control	M	54	23.7118		SAMEA2737766	60468232
SAMEA2738165	Zhang_RA.C164_S	FAM.Zhang_RA.C164	BGI	Zhang-RA	saliva	oral	0	control	F	47	19.8178		SAMEA2738165	80315666
SAMEA2737723	Zhang_RA.C164_S	FAM.Zhang_RA.C164	BGI	Zhang-RA	stool	gut	0	control	F	47	19.8178		SAMEA2737723	70191886
SAMEA2738167	Zhang_RA.C168_R	FAM.Zhang_RA.C168	BGI	Zhang-RA	saliva	oral	0	control	M	28	32.2708		SAMEA2738167	28328552
SAMEA2737817	Zhang_RA.C17	FAM.Zhang_RA.C17	BGI	Zhang-RA	stool	gut	0	control	F	46			SAMEA2737817	68014646
SAMEA2738170	Zhang_RA.C172_S	FAM.Zhang_RA.C172	BGI	Zhang-RA	saliva	oral	0	control	M	34	22.5981		SAMEA2738170	26573912
SAMEA2737734	Zhang_RA.C172_S	FAM.Zhang_RA.C172	BGI	Zhang-RA	stool	gut	0	control	M	34	22.5981		SAMEA2737734	70665438
CT18_OR	Zhang_RA.C18	FAM.Zhang_RA.C18	BGI	Zhang-RA	saliva	oral	0	control	F	41	32.9	SAMEA2738037	SAMEA2738036,SAMEA2738037	13568158
SAMEA2737805	Zhang_RA.C18	FAM.Zhang_RA.C18	BGI	Zhang-RA	stool	gut	0	control	F	41	32.8707		SAMEA2737805	59193066
SAMEA2737729	Zhang_RA.C182_S	FAM.Zhang_RA.C182	BGI	Zhang-RA	stool	gut	0	control	F	26	18.5078		SAMEA2737729	71250322
CT19_OR	Zhang_RA.C19	FAM.Zhang_RA.C19	BGI	Zhang-RA	saliva	oral	0	control	F	37	25.2	SAMEA2738039	SAMEA2738038,SAMEA2738039	3017940
SAMEA2737835	Zhang_RA.C19	FAM.Zhang_RA.C19	BGI	Zhang-RA	stool	gut	0	control	F	37	25.1532		SAMEA2737835	71662278
SAMEA2737771	Zhang_RA.C198_R	FAM.Zhang_RA.C198	BGI	Zhang-RA	stool	gut	0	control	F	28	18.9388		SAMEA2737771	58035924
SAMEA2737754	Zhang_RA.C2	FAM.Zhang_RA.C2	BGI	Zhang-RA	stool	gut	0	control	F	52	19.1111		SAMEA2737754	66274242
SAMEA2737877	Zhang_RA.C20	FAM.Zhang_RA.C20	BGI	Zhang-RA	stool	gut	0	control	F	39	23.1911		SAMEA2737877	69335846
SAMEA2737829	Zhang_RA.C21	FAM.Zhang_RA.C21	BGI	Zhang-RA	stool	gut	0	control	F	57	27.5556		SAMEA2737829	119912950
SAMEA2737786	Zhang_RA.C214_S	FAM.Zhang_RA.C214	BGI	Zhang-RA	stool	gut	0	control	F	56	26.1719		SAMEA2737786	62801144
SAMEA2737879	Zhang_RA.C22	FAM.Zhang_RA.C22	BGI	Zhang-RA	stool	gut	0	control	F	48	25.2994		SAMEA2737879	48341974
SAMEA2738142	Zhang_RA.C22_R	FAM.Zhang_RA.C22_R	BGI	Zhang-RA	saliva	oral	0	control	F	38	21.4844		SAMEA2738142	12241502
SAMEA2737693	Zhang_RA.C22_R	FAM.Zhang_RA.C22_R	BGI	Zhang-RA	stool	gut	0	control	F	38	21.4844		SAMEA2737693	59613916
CT24_OR	Zhang_RA.C24	FAM.Zhang_RA.C24	BGI	Zhang-RA	saliva	oral	0	control	F	53	22	SAMEA2738041	SAMEA2738040,SAMEA2738041	4532678
SAMEA2737803	Zhang_RA.C24	FAM.Zhang_RA.C24	BGI	Zhang-RA	stool	gut	0	control	F	53	22.0317		SAMEA2737803	51070894
SAMEA2737868	Zhang_RA.C25	FAM.Zhang_RA.C25	BGI	Zhang-RA	stool	gut	0	control	F	54	26.4381		SAMEA2737868	63743852
SAMEA2737738	Zhang_RA.C25_S	FAM.Zhang_RA.C25_S	BGI	Zhang-RA	stool	gut	0	control	M	36			SAMEA2737738	76044138
SAMEA2737794	Zhang_RA.C252_R	FAM.Zhang_RA.C252	BGI	Zhang-RA	stool	gut	0	control	M	30	25.9516		SAMEA2737794	63354380
CT26_OR	Zhang_RA.C26	FAM.Zhang_RA.C26	BGI	Zhang-RA	saliva	oral	0	control	F	38	19.8	SAMEA2738043	SAMEA2738042,SAMEA2738043	8041898
SAMEA2737816	Zhang_RA.C26	FAM.Zhang_RA.C26	BGI	Zhang-RA	stool	gut	0	control	F	38	19.7777		SAMEA2737816	74906904
CT27_OR	Zhang_RA.C27	FAM.Zhang_RA.C27	BGI	Zhang-RA	saliva	oral	0	control	F	48	20.2	SAMEA2738045	SAMEA2738044,SAMEA2738045	7190366
SAMEA2737797	Zhang_RA.C27	FAM.Zhang_RA.C27	BGI	Zhang-RA	stool	gut	0	control	F	48	20.202		SAMEA2737797	60334418
CT29_OR	Zhang_RA.C29	FAM.Zhang_RA.C29	BGI	Zhang-RA	saliva	oral	0	control	F	42	24.974	SAMEA2738047	SAMEA2738046,SAMEA2738047	16554070
SAMEA2737800	Zhang_RA.C29	FAM.Zhang_RA.C29	BGI	Zhang-RA	stool	gut	0	control	F	42	24.974		SAMEA2737800	60582764
CT3_OR	Zhang_RA.C3	FAM.Zhang_RA.C3	BGI	Zhang-RA	saliva	oral	0	control	F	45	28.8	SAMEA2738113	SAMEA2738112,SAMEA2738113	40915288
SAMEA2737773	Zhang_RA.C3	FAM.Zhang_RA.C3	BGI	Zhang-RA	stool	gut	0	control	F	45	28.8044		SAMEA2737773	75638300
SAMEA2737865	Zhang_RA.C30	FAM.Zhang_RA.C30	BGI	Zhang-RA	stool	gut	0	control	F	44	26.3702		SAMEA2737865	67693160
CT31_OR	Zhang_RA.C31	FAM.Zhang_RA.C31	BGI	Zhang-RA	saliva	oral	0	control	F	43	26.5	SAMEA2738049	SAMEA2738048,SAMEA2738049	21668070
SAMEA2737796	Zhang_RA.C31	FAM.Zhang_RA.C31	BGI	Zhang-RA	stool	gut	0	control	F	43	26.4514		SAMEA2737796	61653490
CT32_OR	Zhang_RA.C32	FAM.Zhang_RA.C32	BGI	Zhang-RA	saliva	oral	0	control	F	41	26	SAMEA2738051	SAMEA2738050,SAMEA2738051	12867742
SAMEA2737811	Zhang_RA.C32	FAM.Zhang_RA.C32	BGI	Zhang-RA	stool	gut	0	control	F	41	26.0375		SAMEA2737811	78262078
SAMEA2737826	Zhang_RA.C33	FAM.Zhang_RA.C33	BGI	Zhang-RA	stool	gut	0	control	F	45	28.3987		SAMEA2737826	60341574
SAMEA2737789	Zhang_RA.C34	FAM.Zhang_RA.C34	BGI	Zhang-RA	stool	gut	0	control	F	39	23.7253		SAMEA2737789	68546926
CT35_OR	Zhang_RA.C35	FAM.Zhang_RA.C35	BGI	Zhang-RA	saliva	oral	0	control	F	44	25.3	SAMEA2738086	SAMEA2738085,SAMEA2738086	10485218
SAMEA2737804	Zhang_RA.C35	FAM.Zhang_RA.C35	BGI	Zhang-RA	stool	gut	0	control	F	44	25.3203		SAMEA2737804	58207982
CT36_OR	Zhang_RA.C36	FAM.Zhang_RA.C36	BGI	Zhang-RA	saliva	oral	0	control	F	43	26.1	SAMEA2738088	SAMEA2738087,SAMEA2738088	9390458
SAMEA2737822	Zhang_RA.C36	FAM.Zhang_RA.C36	BGI	Zhang-RA	stool	gut	0	control	F	43	26.093		SAMEA2737822	73557292
SAMEA2737874	Zhang_RA.C38	FAM.Zhang_RA.C38	BGI	Zhang-RA	stool	gut	0	control	F	57	22.0386		SAMEA2737874	38117628
SAMEA2737870	Zhang_RA.C39	FAM.Zhang_RA.C39	BGI	Zhang-RA	stool	gut	0	control	F	41	23.4375		SAMEA2737870	60521174
SAMEA2737759	Zhang_RA.C4	FAM.Zhang_RA.C4	BGI	Zhang-RA	stool	gut	0	control	F	43	24.2424		SAMEA2737759	54024340
CT40_OR	Zhang_RA.C40	FAM.Zhang_RA.C40	BGI	Zhang-RA	saliva	oral	0	control	F	40	22	SAMEA2738053	SAMEA2738052,SAMEA2738053	12304880
SAMEA2737832	Zhang_RA.C40	FAM.Zhang_RA.C40	BGI	Zhang-RA	stool	gut	0	control	F	40	21.9713		SAMEA2737832	80593220
SAMEA2737850	Zhang_RA.C41	FAM.Zhang_RA.C41	BGI	Zhang-RA	stool	gut	0	control	F	48	21.2279		SAMEA2737850	57457414
SAMEA2737867	Zhang_RA.C42	FAM.Zhang_RA.C42	BGI	Zhang-RA	stool	gut	0	control	F	38	21.6049		SAMEA2737867	54715374
CT43_OR	Zhang_RA.C43	FAM.Zhang_RA.C43	BGI	Zhang-RA	saliva	oral	0	control	F	46	23	SAMEA2738055	SAMEA2738054,SAMEA2738055	13298544
SAMEA2737798	Zhang_RA.C43	FAM.Zhang_RA.C43	BGI	Zhang-RA	stool	gut	0	control	F	46	23.03		SAMEA2737798	59121378
SAMEA2737818	Zhang_RA.C44	FAM.Zhang_RA.C44	BGI	Zhang-RA	stool	gut	0	control	F	34	21.6311		SAMEA2737818	61405790
SAMEA2737814	Zhang_RA.C45	FAM.Zhang_RA.C45	BGI	Zhang-RA	stool	gut	0	control	M	54	0		SAMEA2737814	78028262
CT47_OR	Zhang_RA.C47	FAM.Zhang_RA.C47	BGI	Zhang-RA	saliva	oral	0	control	F	58	22	SAMEA2738057	SAMEA2738056,SAMEA2738057	4545972
SAMEA2737807	Zhang_RA.C47	FAM.Zhang_RA.C47	BGI	Zhang-RA	stool	gut	0	control	F	58	22.0317		SAMEA2737807	55927116
SAMEA2738119	Zhang_RA.C47_S	FAM.Zhang_RA.C47_S	BGI	Zhang-RA	saliva	oral	0	control	M	33	31.25		SAMEA2738119	65689748
SAMEA2737671	Zhang_RA.C47_S	FAM.Zhang_RA.C47_S	BGI	Zhang-RA	stool	gut	0	control	M	33	31.25		SAMEA2737671	50675110
SAMEA2737813	Zhang_RA.C48	FAM.Zhang_RA.C48	BGI	Zhang-RA	stool	gut	0	control	F	36	19.1953		SAMEA2737813	65714338
SAMEA2737866	Zhang_RA.C49	FAM.Zhang_RA.C49	BGI	Zhang-RA	stool	gut	0	control	F	47	22.8928		SAMEA2737866	70400922
CT50_OR	Zhang_RA.C50	FAM.Zhang_RA.C50	BGI	Zhang-RA	saliva	oral	0	control	F	46	22.9	SAMEA2738059	SAMEA2738058,SAMEA2738059	11576940
SAMEA2737802	Zhang_RA.C50	FAM.Zhang_RA.C50	BGI	Zhang-RA	stool	gut	0	control	F	46	22.9421		SAMEA2737802	58951134
CT51_OR	Zhang_RA.C51	FAM.Zhang_RA.C51	BGI	Zhang-RA	saliva	oral	0	control	F	44	25	SAMEA2738061	SAMEA2738060,SAMEA2738061	31710472
SAMEA2737834	Zhang_RA.C51	FAM.Zhang_RA.C51	BGI	Zhang-RA	stool	gut	0	control	F	44	24.974		SAMEA2737834	53102296
SAMEA2738121	Zhang_RA.C51_S	FAM.Zhang_RA.C51_S	BGI	Zhang-RA	saliva	oral	0	control	M	57	32.2708		SAMEA2738121	42935812
SAMEA2737690	Zhang_RA.C51_S	FAM.Zhang_RA.C51_S	BGI	Zhang-RA	stool	gut	0	control	M	57	32.2708		SAMEA2737690	54857414
SAMEA2737856	Zhang_RA.C52	FAM.Zhang_RA.C52	BGI	Zhang-RA	stool	gut	0	control	F	24	19.4674		SAMEA2737856	63367448
CT53_OR	Zhang_RA.C53	FAM.Zhang_RA.C53	BGI	Zhang-RA	saliva	oral	0	control	M	45	23.9	SAMEA2738063	SAMEA2738062,SAMEA2738063	20368932
SAMEA2737801	Zhang_RA.C53	FAM.Zhang_RA.C53	BGI	Zhang-RA	stool	gut	0	control	M	45	23.8751		SAMEA2737801	64787204
SAMEA2737841	Zhang_RA.C54	FAM.Zhang_RA.C54	BGI	Zhang-RA	stool	gut	0	control	M	50	19.0311		SAMEA2737841	49367836
SAMEA2737799	Zhang_RA.C55	FAM.Zhang_RA.C55	BGI	Zhang-RA	stool	gut	0	control	F	40	20.202		SAMEA2737799	59509144
SAMEA2737878	Zhang_RA.C56	FAM.Zhang_RA.C56	BGI	Zhang-RA	stool	gut	0	control	F	42	23.4375		SAMEA2737878	58512214
SAMEA2737793	Zhang_RA.C57	FAM.Zhang_RA.C57	BGI	Zhang-RA	stool	gut	0	control	F	32	24.0055		SAMEA2737793	37137324
SAMEA2737842	Zhang_RA.C58	FAM.Zhang_RA.C58	BGI	Zhang-RA	stool	gut	0	control	F	35	27.3438		SAMEA2737842	55908578
CT59_OR	Zhang_RA.C59	FAM.Zhang_RA.C59	BGI	Zhang-RA	saliva	oral	0	control	M	27	18.7	SAMEA2738065	SAMEA2738064,SAMEA2738065	49434234
SAMEA2737864	Zhang_RA.C59	FAM.Zhang_RA.C59	BGI	Zhang-RA	stool	gut	0	control	M	27	18.7242		SAMEA2737864	82500834
SAMEA2737790	Zhang_RA.C60	FAM.Zhang_RA.C60	BGI	Zhang-RA	stool	gut	0	control	F	38	21.7193		SAMEA2737790	70626620
CT62_OR	Zhang_RA.C62	FAM.Zhang_RA.C62	BGI	Zhang-RA	saliva	oral	0	control	F	23	19.5	SAMEA2738067	SAMEA2738066,SAMEA2738067	7126032
SAMEA2737873	Zhang_RA.C62	FAM.Zhang_RA.C62	BGI	Zhang-RA	stool	gut	0	control	F	23	19.5312		SAMEA2737873	29535068
SAMEA2737819	Zhang_RA.C63	FAM.Zhang_RA.C63	BGI	Zhang-RA	stool	gut	0	control	F	47	17.5781		SAMEA2737819	63278596
SAMEA2737830	Zhang_RA.C65	FAM.Zhang_RA.C65	BGI	Zhang-RA	stool	gut	0	control	M	45	20.8117		SAMEA2737830	52694728
CT68_OR	Zhang_RA.C68	FAM.Zhang_RA.C68	BGI	Zhang-RA	saliva	oral	0	control	M	38	22.5	SAMEA2738069	SAMEA2738068,SAMEA2738069	25739500
SAMEA2737876	Zhang_RA.C68	FAM.Zhang_RA.C68	BGI	Zhang-RA	stool	gut	0	control	M	38	22.4913		SAMEA2737876	65281292
SAMEA2737858	Zhang_RA.C69	FAM.Zhang_RA.C69	BGI	Zhang-RA	stool	gut	0	control	F	19	19.0451		SAMEA2737858	75014500
CT7_OR	Zhang_RA.C7	FAM.Zhang_RA.C7	BGI	Zhang-RA	saliva	oral	0	control	F	54	25.4	SAMEA2738071	SAMEA2738070,SAMEA2738071	16671660
SAMEA2737824	Zhang_RA.C7	FAM.Zhang_RA.C7	BGI	Zhang-RA	stool	gut	0	control	F	54	25.3906		SAMEA2737824	57548758
CT70_OR	Zhang_RA.C70	FAM.Zhang_RA.C70	BGI	Zhang-RA	saliva	oral	0	control	M	48	22	SAMEA2738073	SAMEA2738072,SAMEA2738073	6440600
SAMEA2737872	Zhang_RA.C70	FAM.Zhang_RA.C70	BGI	Zhang-RA	stool	gut	0	control	M	48	22.0386		SAMEA2737872	30024668
CT71_OR	Zhang_RA.C71	FAM.Zhang_RA.C71	BGI	Zhang-RA	saliva	oral	0	control	F	48	24	SAMEA2738075	SAMEA2738074,SAMEA2738075	13903904
SAMEA2737810	Zhang_RA.C71	FAM.Zhang_RA.C71	BGI	Zhang-RA	stool	gut	0	control	F	48	24		SAMEA2737810	70602322
CT72_OR	Zhang_RA.C72	FAM.Zhang_RA.C72	BGI	Zhang-RA	saliva	oral	0	control	M	35	25.8	SAMEA2738077	SAMEA2738076,SAMEA2738077	49329274
SAMEA2737854	Zhang_RA.C72	FAM.Zhang_RA.C72	BGI	Zhang-RA	stool	gut	0	control	M	35	25.7657		SAMEA2737854	73697930
SAMEA2737880	Zhang_RA.C73	FAM.Zhang_RA.C73	BGI	Zhang-RA	stool	gut	0	control	F	46	27.3438		SAMEA2737880	61293380
SAMEA2737857	Zhang_RA.C74	FAM.Zhang_RA.C74	BGI	Zhang-RA	stool	gut	0	control	M	22	25.565		SAMEA2737857	88633956
SAMEA2737852	Zhang_RA.C75	FAM.Zhang_RA.C75	BGI	Zhang-RA	stool	gut	0	control	M	44	28.6851		SAMEA2737852	79315704
SAMEA2737795	Zhang_RA.C76	FAM.Zhang_RA.C76	BGI	Zhang-RA	stool	gut	0	control	M	44	22.2753		SAMEA2737795	60615168
SAMEA2737851	Zhang_RA.C77	FAM.Zhang_RA.C77	BGI	Zhang-RA	stool	gut	0	control	M	36	17.9282		SAMEA2737851	62762364
SAMEA2737861	Zhang_RA.C78	FAM.Zhang_RA.C78	BGI	Zhang-RA	stool	gut	0	control	M	24	19.3625		SAMEA2737861	76008160
SAMEA2737815	Zhang_RA.C80	FAM.Zhang_RA.C80	BGI	Zhang-RA	stool	gut	0	control	F	43	22.3757		SAMEA2737815	69992296
SAMEA2737862	Zhang_RA.C84	FAM.Zhang_RA.C84	BGI	Zhang-RA	stool	gut	0	control	M	28	24.2215		SAMEA2737862	68961210
SAMEA2737683	Zhang_RA.C84_R	FAM.Zhang_RA.C84_R	BGI	Zhang-RA	stool	gut	0	control	M	48			SAMEA2737683	74037834
SAMEA2738136	Zhang_RA.C88_S	FAM.Zhang_RA.C88	BGI	Zhang-RA	saliva	oral	0	control	M	42	22.5827		SAMEA2738136	8165746
SAMEA2737686	Zhang_RA.C88_S	FAM.Zhang_RA.C88	BGI	Zhang-RA	stool	gut	0	control	M	42	22.5827		SAMEA2737686	59204452
CT89_OR	Zhang_RA.C89	FAM.Zhang_RA.C89	BGI	Zhang-RA	saliva	oral	0	control	M	42	20.1	SAMEA2738079	SAMEA2738078,SAMEA2738079	40294360
SAMEA2737853	Zhang_RA.C89	FAM.Zhang_RA.C89	BGI	Zhang-RA	stool	gut	0	control	M	42	20.0617		SAMEA2737853	71622760
SAMEA2738115	Zhang_RA.C9_S	FAM.Zhang_RA.C9	BGI	Zhang-RA	saliva	oral	0	control	M	35	26.1719		SAMEA2738115	35374406
SAMEA2737871	Zhang_RA.C90	FAM.Zhang_RA.C90	BGI	Zhang-RA	stool	gut	0	control	M	47	17.301		SAMEA2737871	42715088
SAMEA2737806	Zhang_RA.C91	FAM.Zhang_RA.C91	BGI	Zhang-RA	stool	gut	0	control	M	54	19.0311		SAMEA2737806	64153550
SAMEA2737860	Zhang_RA.C92	FAM.Zhang_RA.C92	BGI	Zhang-RA	stool	gut	0	control	F	52	23.4236		SAMEA2737860	78993296
CT93_OR	Zhang_RA.C93	FAM.Zhang_RA.C93	BGI	Zhang-RA	saliva	oral	0	control	F	57	25	SAMEA2738081	SAMEA2738080,SAMEA2738081	18334960
SAMEA2737869	Zhang_RA.C93	FAM.Zhang_RA.C93	BGI	Zhang-RA	stool	gut	0	control	F	57	24.974		SAMEA2737869	78998530
CT99_OR	Zhang_RA.C99	FAM.Zhang_RA.C99	BGI	Zhang-RA	saliva	oral	0	control	F	41	21.3	SAMEA2738083	SAMEA2738082,SAMEA2738083	10067996
SAMEA2737831	Zhang_RA.C99	FAM.Zhang_RA.C99	BGI	Zhang-RA	stool	gut	0	control	F	41	21.3039		SAMEA2737831	74097828
SAMEA2737843	Zhang_RA.CH	FAM.Zhang_RA.CH	BGI	Zhang-RA	stool	gut	0	control					SAMEA2737843	56854292
SAMEA2738101	Zhang_RA.D1	FAM.Zhang_RA.C1	BGI	Zhang-RA	saliva	oral	90	rheumatoid_arthritis	F	32	16.901		SAMEA2738101	8602204
SAMEA2738133	Zhang_RA.D100	FAM.Zhang_RA.D100	BGI	Zhang-RA	saliva	oral	0	rheumatoid_arthritis	F	42	25.9645		SAMEA2738133	61312526
SAMEA2737675	Zhang_RA.D100	FAM.Zhang_RA.D100	BGI	Zhang-RA	stool	gut	0	rheumatoid_arthritis	F	42	25.9645		SAMEA2737675	57569974
SAMEA2737757	Zhang_RA.D100	FAM.Zhang_RA.D100	BGI	Zhang-RA	stool	gut	90	rheumatoid_arthritis	F	42	25.9645		SAMEA2737757	56466820
SAMEA2737699	Zhang_RA.D102	FAM.Zhang_RA.D102	BGI	Zhang-RA	stool	gut	0	rheumatoid_arthritis	M	56	22.7244		SAMEA2737699	65062888
SAMEA2738134	Zhang_RA.D104	FAM.Zhang_RA.C104	BGI	Zhang-RA	saliva	oral	0	rheumatoid_arthritis	F	64	22.0386		SAMEA2738134	49767220
SAMEA2737672	Zhang_RA.D104	FAM.Zhang_RA.C104	BGI	Zhang-RA	stool	gut	0	rheumatoid_arthritis	F	64	22.0386		SAMEA2737672	69853664
SAMEA2738140	Zhang_RA.D108	FAM.Zhang_RA.D108	BGI	Zhang-RA	saliva	oral	0	rheumatoid_arthritis	F	52	23.5078		SAMEA2738140	60689454
SAMEA2737700	Zhang_RA.D108	FAM.Zhang_RA.D108	BGI	Zhang-RA	stool	gut	0	rheumatoid_arthritis	F	52	23.5078		SAMEA2737700	57906998
SAMEA2738093	Zhang_RA.D113	FAM.Zhang_RA.D113	BGI	Zhang-RA	saliva	oral	90	rheumatoid_arthritis	F	46	29.5159		SAMEA2738093	35054384
SAMEA2738137	Zhang_RA.D113	FAM.Zhang_RA.D113	BGI	Zhang-RA	saliva	oral	0	rheumatoid_arthritis	F	46	29.5159		SAMEA2738137	53399294
SAMEA2737677	Zhang_RA.D113	FAM.Zhang_RA.D113	BGI	Zhang-RA	stool	gut	0	rheumatoid_arthritis	F	46	29.5159		SAMEA2737677	60617238
SAMEA2738128	Zhang_RA.D114	FAM.Zhang_RA.D114	BGI	Zhang-RA	saliva	oral	0	rheumatoid_arthritis	M	53	19.487		SAMEA2738128	43549956
SAMEA2737701	Zhang_RA.D114	FAM.Zhang_RA.D114	BGI	Zhang-RA	stool	gut	0	rheumatoid_arthritis	M	53	19.487		SAMEA2737701	65891066
SAMEA2738145	Zhang_RA.D117	FAM.Zhang_RA.D117	BGI	Zhang-RA	saliva	oral	0	rheumatoid_arthritis	F	55	21.4844		SAMEA2738145	69368540
SAMEA2738094	Zhang_RA.D118	FAM.Zhang_RA.D118	BGI	Zhang-RA	saliva	oral	90	rheumatoid_arthritis	F	59	22.3133		SAMEA2738094	5633434
SAMEA2738146	Zhang_RA.D118	FAM.Zhang_RA.D118	BGI	Zhang-RA	saliva	oral	0	rheumatoid_arthritis	F	59	22.3133		SAMEA2738146	75548316
SAMEA2737702	Zhang_RA.D118	FAM.Zhang_RA.D118	BGI	Zhang-RA	stool	gut	0	rheumatoid_arthritis	F	59	22.3133		SAMEA2737702	69486914
SAMEA2738147	Zhang_RA.D121	FAM.Zhang_RA.D121	BGI	Zhang-RA	saliva	oral	0	rheumatoid_arthritis	F	38	23.4375		SAMEA2738147	11884620
SAMEA2737703	Zhang_RA.D121	FAM.Zhang_RA.D121	BGI	Zhang-RA	stool	gut	0	rheumatoid_arthritis	F	38	23.4375		SAMEA2737703	59193110
SAMEA2738104	Zhang_RA.D122	FAM.Zhang_RA.C122	BGI	Zhang-RA	saliva	oral	90	rheumatoid_arthritis	F	62	24.677		SAMEA2738104	17559162
SAMEA2738148	Zhang_RA.D122	FAM.Zhang_RA.C122	BGI	Zhang-RA	saliva	oral	0	rheumatoid_arthritis	F	62	24.677		SAMEA2738148	53476782
SAMEA2737655	Zhang_RA.D122	FAM.Zhang_RA.C122	BGI	Zhang-RA	stool	gut	90	rheumatoid_arthritis	F	62	24.677		SAMEA2737655	54566326
SAMEA2737704	Zhang_RA.D122	FAM.Zhang_RA.C122	BGI	Zhang-RA	stool	gut	0	rheumatoid_arthritis	F	62	24.677		SAMEA2737704	57434138
SAMEA2738149	Zhang_RA.D124	FAM.Zhang_RA.C124	BGI	Zhang-RA	saliva	oral	0	rheumatoid_arthritis	F	61	20.8117		SAMEA2738149	36496718
SAMEA2737666	Zhang_RA.D124	FAM.Zhang_RA.C124	BGI	Zhang-RA	stool	gut	180	rheumatoid_arthritis	F	61	20.8117		SAMEA2737666	48397300
SAMEA2737706	Zhang_RA.D124	FAM.Zhang_RA.C124	BGI	Zhang-RA	stool	gut	0	rheumatoid_arthritis	F	61	20.8117		SAMEA2737706	63082320
SAMEA2738150	Zhang_RA.D126	FAM.Zhang_RA.C126	BGI	Zhang-RA	saliva	oral	0	rheumatoid_arthritis	M	53	24.2215		SAMEA2738150	51086520
SAMEA2737708	Zhang_RA.D126	FAM.Zhang_RA.C126	BGI	Zhang-RA	stool	gut	0	rheumatoid_arthritis	M	53	24.2215		SAMEA2737708	63379336
SAMEA2737846	Zhang_RA.D126	FAM.Zhang_RA.C126	BGI	Zhang-RA	stool	gut	90	rheumatoid_arthritis	M	53	24.2215		SAMEA2737846	73484640
SAMEA2738152	Zhang_RA.D130	FAM.Zhang_RA.C130	BGI	Zhang-RA	saliva	oral	0	rheumatoid_arthritis	M	57	22.2041		SAMEA2738152	65999938
SAMEA2737710	Zhang_RA.D130	FAM.Zhang_RA.C130	BGI	Zhang-RA	stool	gut	0	rheumatoid_arthritis	M	57	22.2041		SAMEA2737710	63924258
SAMEA2738154	Zhang_RA.D132	FAM.Zhang_RA.D132	BGI	Zhang-RA	saliva	oral	0	rheumatoid_arthritis	F	35	23.5883		SAMEA2738154	56458394
SAMEA2737664	Zhang_RA.D132	FAM.Zhang_RA.D132	BGI	Zhang-RA	stool	gut	180	rheumatoid_arthritis	F	35	23.5883		SAMEA2737664	47069668
SAMEA2737712	Zhang_RA.D132	FAM.Zhang_RA.D132	BGI	Zhang-RA	stool	gut	0	rheumatoid_arthritis	F	35	23.5883		SAMEA2737712	63503624
SAMEA2738155	Zhang_RA.D133	FAM.Zhang_RA.D133	BGI	Zhang-RA	saliva	oral	0	rheumatoid_arthritis	F	65	19.5312		SAMEA2738155	56877964
SAMEA2737713	Zhang_RA.D133	FAM.Zhang_RA.D133	BGI	Zhang-RA	stool	gut	0	rheumatoid_arthritis	F	65	19.5312		SAMEA2737713	72902988
SAMEA2737749	Zhang_RA.D134	FAM.Zhang_RA.D134	BGI	Zhang-RA	stool	gut	0	rheumatoid_arthritis	F	54	18.8271		SAMEA2737749	60812544
SAMEA2738095	Zhang_RA.D135	FAM.Zhang_RA.D135	BGI	Zhang-RA	saliva	oral	90	rheumatoid_arthritis	F	52	23.634		SAMEA2738095	44180958
SAMEA2738156	Zhang_RA.D135	FAM.Zhang_RA.D135	BGI	Zhang-RA	saliva	oral	0	rheumatoid_arthritis	F	52	23.634		SAMEA2738156	27110054
SAMEA2737714	Zhang_RA.D135	FAM.Zhang_RA.D135	BGI	Zhang-RA	stool	gut	0	rheumatoid_arthritis	F	52	23.634		SAMEA2737714	75073360
SAMEA2738096	Zhang_RA.D138	FAM.Zhang_RA.D138	BGI	Zhang-RA	saliva	oral	90	rheumatoid_arthritis	F	67	20.8117		SAMEA2738096	27228092
SAMEA2737774	Zhang_RA.D138	FAM.Zhang_RA.D138	BGI	Zhang-RA	stool	gut	0	rheumatoid_arthritis	F	67	20.8117		SAMEA2737774	84300186
SAMEA2737849	Zhang_RA.D138	FAM.Zhang_RA.D138	BGI	Zhang-RA	stool	gut	90	rheumatoid_arthritis	F	67	20.8117		SAMEA2737849	55112894
SAMEA2738084	Zhang_RA.D14	FAM.Zhang_RA.D14	BGI	Zhang-RA	saliva	oral	90	rheumatoid_arthritis	F	48	19.8413		SAMEA2738084	16740558
SAMEA2737848	Zhang_RA.D141	FAM.Zhang_RA.D141	BGI	Zhang-RA	stool	gut	0	rheumatoid_arthritis	F	53	17.5781		SAMEA2737848	61413880
SAMEA2738157	Zhang_RA.D144	FAM.Zhang_RA.D144	BGI	Zhang-RA	saliva	oral	0	rheumatoid_arthritis	M	54	21.7181		SAMEA2738157	72755892
SAMEA2738158	Zhang_RA.D145	FAM.Zhang_RA.C145	BGI	Zhang-RA	saliva	oral	0	rheumatoid_arthritis	M	50	17.9592		SAMEA2738158	58464704
SAMEA2737715	Zhang_RA.D145	FAM.Zhang_RA.C145	BGI	Zhang-RA	stool	gut	0	rheumatoid_arthritis	M	50	17.9592		SAMEA2737715	67482080
SAMEA2738160	Zhang_RA.D147	FAM.Zhang_RA.C147	BGI	Zhang-RA	saliva	oral	0	rheumatoid_arthritis	F	59	22.0386		SAMEA2738160	22272850
SAMEA2737651	Zhang_RA.D147	FAM.Zhang_RA.C147	BGI	Zhang-RA	stool	gut	420	rheumatoid_arthritis	F	59	22.0386		SAMEA2737651	58882664
SAMEA2737717	Zhang_RA.D147	FAM.Zhang_RA.C147	BGI	Zhang-RA	stool	gut	0	rheumatoid_arthritis	F	59	22.0386		SAMEA2737717	57052002
SAMEA2738138	Zhang_RA.D15	FAM.Zhang_RA.C15	BGI	Zhang-RA	saliva	oral	0	rheumatoid_arthritis	F	43	20.202		SAMEA2738138	41603978
SAMEA2737691	Zhang_RA.D15	FAM.Zhang_RA.C15	BGI	Zhang-RA	stool	gut	0	rheumatoid_arthritis	F	43	20.202		SAMEA2737691	51270852
SAMEA2738105	Zhang_RA.D150	FAM.Zhang_RA.C150	BGI	Zhang-RA	saliva	oral	90	rheumatoid_arthritis	F	49	18.75		SAMEA2738105	10656252
SAMEA2738161	Zhang_RA.D150	FAM.Zhang_RA.C150	BGI	Zhang-RA	saliva	oral	0	rheumatoid_arthritis	F	49	18.75		SAMEA2738161	30577662
SAMEA2737718	Zhang_RA.D150	FAM.Zhang_RA.C150	BGI	Zhang-RA	stool	gut	0	rheumatoid_arthritis	F	49	18.75		SAMEA2737718	61099476
SAMEA2737838	Zhang_RA.D153	FAM.Zhang_RA.D153	BGI	Zhang-RA	stool	gut	0	rheumatoid_arthritis	F	70	24.4561		SAMEA2737838	78708166
SAMEA2738102	Zhang_RA.D155	FAM.Zhang_RA.C155	BGI	Zhang-RA	saliva	oral	90	rheumatoid_arthritis	F	40	24.4561		SAMEA2738102	49462176
SAMEA2737750	Zhang_RA.D155	FAM.Zhang_RA.C155	BGI	Zhang-RA	stool	gut	0	rheumatoid_arthritis	F	40	24.4561		SAMEA2737750	73422402
SAMEA2738106	Zhang_RA.D157	FAM.Zhang_RA.D157	BGI	Zhang-RA	saliva	oral	90	rheumatoid_arthritis	F	55	22.0604		SAMEA2738106	12943218
SAMEA2737721	Zhang_RA.D157	FAM.Zhang_RA.D157	BGI	Zhang-RA	stool	gut	0	rheumatoid_arthritis	F	55	22.0604		SAMEA2737721	67824848
SAMEA2737821	Zhang_RA.D157	FAM.Zhang_RA.D157	BGI	Zhang-RA	stool	gut	90	rheumatoid_arthritis	F	55	22.0604		SAMEA2737821	74226068
SAMEA2738103	Zhang_RA.D158	FAM.Zhang_RA.D158	BGI	Zhang-RA	saliva	oral	90	rheumatoid_arthritis	M	60	24.977		SAMEA2738103	47873874
SAMEA2738164	Zhang_RA.D158	FAM.Zhang_RA.D158	BGI	Zhang-RA	saliva	oral	0	rheumatoid_arthritis	M	60	24.977		SAMEA2738164	64359758
SAMEA2737722	Zhang_RA.D158	FAM.Zhang_RA.D158	BGI	Zhang-RA	stool	gut	0	rheumatoid_arthritis	M	60	24.977		SAMEA2737722	69995556
SAMEA2737845	Zhang_RA.D158	FAM.Zhang_RA.D158	BGI	Zhang-RA	stool	gut	90	rheumatoid_arthritis	M	60	24.977		SAMEA2737845	70375996
SAMEA2737761	Zhang_RA.D159	FAM.Zhang_RA.D159	BGI	Zhang-RA	stool	gut	0	rheumatoid_arthritis	F	48	22.5827		SAMEA2737761	81480756
SAMEA2737768	Zhang_RA.D161	FAM.Zhang_RA.C161	BGI	Zhang-RA	stool	gut	0	rheumatoid_arthritis	F	50	25.2363		SAMEA2737768	67141942
SAMEA2737775	Zhang_RA.D163	FAM.Zhang_RA.D163	BGI	Zhang-RA	stool	gut	0	rheumatoid_arthritis	F	55	24.0346		SAMEA2737775	74319090
SAMEA2738166	Zhang_RA.D166	FAM.Zhang_RA.D166	BGI	Zhang-RA	saliva	oral	0	rheumatoid_arthritis	F	36	23.8751		SAMEA2738166	118427488
SAMEA2737724	Zhang_RA.D166	FAM.Zhang_RA.D166	BGI	Zhang-RA	stool	gut	0	rheumatoid_arthritis	F	36	23.8751		SAMEA2737724	68236492
SAMEA2737772	Zhang_RA.D168	FAM.Zhang_RA.C168	BGI	Zhang-RA	stool	gut	0	rheumatoid_arthritis	F	24	19.433		SAMEA2737772	59879368
SAMEA2737657	Zhang_RA.D169	FAM.Zhang_RA.D169	BGI	Zhang-RA	stool	gut	180	rheumatoid_arthritis	F	53	25.3906		SAMEA2737657	55292064
SAMEA2737760	Zhang_RA.D169	FAM.Zhang_RA.D169	BGI	Zhang-RA	stool	gut	0	rheumatoid_arthritis	F	55	25.3906		SAMEA2737760	60826178
SAMEA2738168	Zhang_RA.D172	FAM.Zhang_RA.C172	BGI	Zhang-RA	saliva	oral	0	rheumatoid_arthritis	F	52	28.0404		SAMEA2738168	48309580
SAMEA2737736	Zhang_RA.D172	FAM.Zhang_RA.C172	BGI	Zhang-RA	stool	gut	0	rheumatoid_arthritis	F	52	28.0404		SAMEA2737736	63197186
SAMEA2738169	Zhang_RA.D173	FAM.Zhang_RA.D173	BGI	Zhang-RA	saliva	oral	0	rheumatoid_arthritis	F	48	30.8594		SAMEA2738169	61783584
SAMEA2737735	Zhang_RA.D173	FAM.Zhang_RA.D173	BGI	Zhang-RA	stool	gut	0	rheumatoid_arthritis	F	48	30.8594		SAMEA2737735	62370300
SAMEA2737745	Zhang_RA.D174	FAM.Zhang_RA.D174	BGI	Zhang-RA	stool	gut	0	rheumatoid_arthritis	F	39	21.2585		SAMEA2737745	73389146
SAMEA2738171	Zhang_RA.D177	FAM.Zhang_RA.D177	BGI	Zhang-RA	saliva	oral	0	rheumatoid_arthritis	F	46	25.7117		SAMEA2738171	65769116
SAMEA2737733	Zhang_RA.D177	FAM.Zhang_RA.D177	BGI	Zhang-RA	stool	gut	0	rheumatoid_arthritis	F	46	25.7117		SAMEA2737733	66740048
SAMEA2738172	Zhang_RA.D178	FAM.Zhang_RA.D178	BGI	Zhang-RA	saliva	oral	0	rheumatoid_arthritis	F	41	21.0938		SAMEA2738172	40348984
SAMEA2737732	Zhang_RA.D178	FAM.Zhang_RA.D178	BGI	Zhang-RA	stool	gut	0	rheumatoid_arthritis	F	41	21.0938		SAMEA2737732	78670720
SAMEA2738097	Zhang_RA.D179	FAM.Zhang_RA.D179	BGI	Zhang-RA	saliva	oral	90	rheumatoid_arthritis	M	47	30.111		SAMEA2738097	15605800
SAMEA2738173	Zhang_RA.D179	FAM.Zhang_RA.D179	BGI	Zhang-RA	saliva	oral	0	rheumatoid_arthritis	M	47	30.111		SAMEA2738173	42714184
SAMEA2737731	Zhang_RA.D179	FAM.Zhang_RA.D179	BGI	Zhang-RA	stool	gut	0	rheumatoid_arthritis	M	47	30.111		SAMEA2737731	71746422
SAMEA2738098	Zhang_RA.D182	FAM.Zhang_RA.C182	BGI	Zhang-RA	saliva	oral	90	rheumatoid_arthritis	F	49	27.7344		SAMEA2738098	8319676
SAMEA2738174	Zhang_RA.D182	FAM.Zhang_RA.C182	BGI	Zhang-RA	saliva	oral	0	rheumatoid_arthritis	F	49	25.7117		SAMEA2738174	61075548
SAMEA2737730	Zhang_RA.D182	FAM.Zhang_RA.C182	BGI	Zhang-RA	stool	gut	0	rheumatoid_arthritis	F	49	25.7117		SAMEA2737730	58561834
SAMEA2737776	Zhang_RA.D184	FAM.Zhang_RA.D184	BGI	Zhang-RA	stool	gut	0	rheumatoid_arthritis	M	59	20.0474		SAMEA2737776	59402220
SAMEA2738175	Zhang_RA.D185	FAM.Zhang_RA.D185	BGI	Zhang-RA	saliva	oral	0	rheumatoid_arthritis	F	44	22.6003		SAMEA2738175	59677776
SAMEA2737728	Zhang_RA.D185	FAM.Zhang_RA.D185	BGI	Zhang-RA	stool	gut	0	rheumatoid_arthritis	F	44	22.6003		SAMEA2737728	66003504
SAMEA2737777	Zhang_RA.D187	FAM.Zhang_RA.D187	BGI	Zhang-RA	stool	gut	0	rheumatoid_arthritis	F	63	37.7778		SAMEA2737777	63743994
SAMEA2738176	Zhang_RA.D188	FAM.Zhang_RA.D188	BGI	Zhang-RA	saliva	oral	0	rheumatoid_arthritis	F	56	24.0346		SAMEA2738176	58133802
SAMEA2737727	Zhang_RA.D188	FAM.Zhang_RA.D188	BGI	Zhang-RA	stool	gut	0	rheumatoid_arthritis	F	56	24.0346		SAMEA2737727	63051324
SAMEA2738177	Zhang_RA.D190	FAM.Zhang_RA.D190	BGI	Zhang-RA	saliva	oral	0	rheumatoid_arthritis	F	36	27.4714		SAMEA2738177	64232332
SAMEA2737726	Zhang_RA.D190	FAM.Zhang_RA.D190	BGI	Zhang-RA	stool	gut	0	rheumatoid_arthritis	F	36	27.4714		SAMEA2737726	67656686
SAMEA2738089	Zhang_RA.D191	FAM.Zhang_RA.D191	BGI	Zhang-RA	saliva	oral	30	rheumatoid_arthritis	M	46	22.8374		SAMEA2738089	30302030
SAMEA2737762	Zhang_RA.D191	FAM.Zhang_RA.D191	BGI	Zhang-RA	stool	gut	30	rheumatoid_arthritis	M	46	22.8374		SAMEA2737762	70419588
SAMEA2737778	Zhang_RA.D194	FAM.Zhang_RA.D194	BGI	Zhang-RA	stool	gut	0	rheumatoid_arthritis	F	52	25.0995		SAMEA2737778	65981634
SAMEA2737779	Zhang_RA.D195	FAM.Zhang_RA.D195	BGI	Zhang-RA	stool	gut	0	rheumatoid_arthritis	F	56	22.2656		SAMEA2737779	68756164
SAMEA2737839	Zhang_RA.D195	FAM.Zhang_RA.D195	BGI	Zhang-RA	stool	gut	90	rheumatoid_arthritis	F	56	22.2656		SAMEA2737839	77260992
SAMEA2737780	Zhang_RA.D196	FAM.Zhang_RA.D196	BGI	Zhang-RA	stool	gut	0	rheumatoid_arthritis	F	63	27.6888		SAMEA2737780	56107304
SAMEA2738107	Zhang_RA.D197	FAM.Zhang_RA.D197	BGI	Zhang-RA	saliva	oral	90	rheumatoid_arthritis	F	34	17.5781		SAMEA2738107	8672050
SAMEA2737742	Zhang_RA.D197	FAM.Zhang_RA.D197	BGI	Zhang-RA	stool	gut	0	rheumatoid_arthritis	F	34	17.5781		SAMEA2737742	76453834
SAMEA2737792	Zhang_RA.D197	FAM.Zhang_RA.D197	BGI	Zhang-RA	stool	gut	90	rheumatoid_arthritis	F	34	17.5781		SAMEA2737792	34522546
SAMEA2737663	Zhang_RA.D198	FAM.Zhang_RA.C198	BGI	Zhang-RA	stool	gut	180	rheumatoid_arthritis	F	48	21.3068		SAMEA2737663	49821290
SAMEA2737781	Zhang_RA.D198	FAM.Zhang_RA.C198	BGI	Zhang-RA	stool	gut	0	rheumatoid_arthritis	F	48	21.3068		SAMEA2737781	59480792
SAMEA2737649	Zhang_RA.D201	FAM.Zhang_RA.D201	BGI	Zhang-RA	stool	gut	365	rheumatoid_arthritis	M	49	20.7612		SAMEA2737649	57698296
SAMEA2737737	Zhang_RA.D201	FAM.Zhang_RA.D201	BGI	Zhang-RA	stool	gut	0	rheumatoid_arthritis	M	49	20.7612		SAMEA2737737	71016022
SAMEA2738108	Zhang_RA.D202	FAM.Zhang_RA.D202	BGI	Zhang-RA	saliva	oral	90	rheumatoid_arthritis	F	53	28.1337		SAMEA2738108	17077112
SAMEA2737782	Zhang_RA.D202	FAM.Zhang_RA.D202	BGI	Zhang-RA	stool	gut	0	rheumatoid_arthritis	F	53	28.1337		SAMEA2737782	58374382
SAMEA2737837	Zhang_RA.D202	FAM.Zhang_RA.D202	BGI	Zhang-RA	stool	gut	90	rheumatoid_arthritis	F	53	28.1337		SAMEA2737837	65807188
SAMEA2737783	Zhang_RA.D204	FAM.Zhang_RA.D204	BGI	Zhang-RA	stool	gut	0	rheumatoid_arthritis	F	40	24.9135		SAMEA2737783	60728828
SAMEA2737665	Zhang_RA.D205	FAM.Zhang_RA.D205	BGI	Zhang-RA	stool	gut	180	rheumatoid_arthritis	F	53	24.974		SAMEA2737665	45729006
SAMEA2737740	Zhang_RA.D205	FAM.Zhang_RA.D205	BGI	Zhang-RA	stool	gut	0	rheumatoid_arthritis	F	53	24.974		SAMEA2737740	79913064
SAMEA2737784	Zhang_RA.D206	FAM.Zhang_RA.D206	BGI	Zhang-RA	stool	gut	0	rheumatoid_arthritis	F	54	27.1203		SAMEA2737784	77917418
SAMEA2737808	Zhang_RA.D206	FAM.Zhang_RA.D206	BGI	Zhang-RA	stool	gut	90	rheumatoid_arthritis	F	54	27.1203		SAMEA2737808	79574344
SAMEA2737751	Zhang_RA.D208	FAM.Zhang_RA.D208	BGI	Zhang-RA	stool	gut	0	rheumatoid_arthritis	M	64	21.7738		SAMEA2737751	67228824
SAMEA2737827	Zhang_RA.D208	FAM.Zhang_RA.D208	BGI	Zhang-RA	stool	gut	90	rheumatoid_arthritis	M	64	21.7738		SAMEA2737827	49747394
SAMEA2738109	Zhang_RA.D209	FAM.Zhang_RA.D209	BGI	Zhang-RA	saliva	oral	90	rheumatoid_arthritis	F	34	22.3757		SAMEA2738109	3612404
SAMEA2737741	Zhang_RA.D209	FAM.Zhang_RA.D209	BGI	Zhang-RA	stool	gut	0	rheumatoid_arthritis	F	34	22.3757		SAMEA2737741	69933476
SAMEA2737828	Zhang_RA.D209	FAM.Zhang_RA.D209	BGI	Zhang-RA	stool	gut	90	rheumatoid_arthritis	F	34	22.3757		SAMEA2737828	68888566
SAMEA2737668	Zhang_RA.D210	FAM.Zhang_RA.D210	BGI	Zhang-RA	stool	gut	180	rheumatoid_arthritis	F	54	19.3337		SAMEA2737668	58972426
SAMEA2737785	Zhang_RA.D210	FAM.Zhang_RA.D210	BGI	Zhang-RA	stool	gut	0	rheumatoid_arthritis	F	54	19.3337		SAMEA2737785	82999424
SAMEA2737662	Zhang_RA.D212	FAM.Zhang_RA.D212	BGI	Zhang-RA	stool	gut	90	rheumatoid_arthritis	F	51	27.5482		SAMEA2737662	50560142
SAMEA2737743	Zhang_RA.D212	FAM.Zhang_RA.D212	BGI	Zhang-RA	stool	gut	0	rheumatoid_arthritis	F	51	27.5482		SAMEA2737743	63545170
SAMEA2737752	Zhang_RA.D213	FAM.Zhang_RA.D213	BGI	Zhang-RA	stool	gut	0	rheumatoid_arthritis	M	65	29.321		SAMEA2737752	76799894
SAMEA2737747	Zhang_RA.D214	FAM.Zhang_RA.C214	BGI	Zhang-RA	stool	gut	0	rheumatoid_arthritis	M	57	25.1808		SAMEA2737747	62465476
SAMEA2737875	Zhang_RA.D216	FAM.Zhang_RA.D216	BGI	Zhang-RA	stool	gut	0	rheumatoid_arthritis	F	48	22.0386		SAMEA2737875	62871430
SAMEA2737746	Zhang_RA.D218	FAM.Zhang_RA.D218	BGI	Zhang-RA	stool	gut	0	rheumatoid_arthritis	M	41	17.3611		SAMEA2737746	77623188
SAMEA2737787	Zhang_RA.D219	FAM.Zhang_RA.D219	BGI	Zhang-RA	stool	gut	0	rheumatoid_arthritis	M	52	24.3025		SAMEA2737787	81222934
SAMEA2737767	Zhang_RA.D220	FAM.Zhang_RA.D220	BGI	Zhang-RA	stool	gut	0	rheumatoid_arthritis	F	45	27.3438		SAMEA2737767	61603504
SAMEA2738110	Zhang_RA.D225	FAM.Zhang_RA.D225	BGI	Zhang-RA	saliva	oral	90	rheumatoid_arthritis	F	46	20.0288		SAMEA2738110	31098496
SAMEA2737764	Zhang_RA.D225	FAM.Zhang_RA.D225	BGI	Zhang-RA	stool	gut	0	rheumatoid_arthritis	F	46	20.0288		SAMEA2737764	66469000
SAMEA2737820	Zhang_RA.D225	FAM.Zhang_RA.D225	BGI	Zhang-RA	stool	gut	90	rheumatoid_arthritis	F	46	20.0288		SAMEA2737820	66312984
SAMEA2737753	Zhang_RA.D226	FAM.Zhang_RA.D226	BGI	Zhang-RA	stool	gut	0	rheumatoid_arthritis	M	61	24.5065		SAMEA2737753	65285702
SAMEA2737656	Zhang_RA.D235	FAM.Zhang_RA.D235	BGI	Zhang-RA	stool	gut	180	rheumatoid_arthritis	M	58	20.7612		SAMEA2737656	54353102
SAMEA2737769	Zhang_RA.D235	FAM.Zhang_RA.D235	BGI	Zhang-RA	stool	gut	0	rheumatoid_arthritis	M	58	20.7612		SAMEA2737769	64001188
SAMEA2738111	Zhang_RA.D240	FAM.Zhang_RA.D240	BGI	Zhang-RA	saliva	oral	90	rheumatoid_arthritis	F	56	20.7612		SAMEA2738111	19436724
SAMEA2737836	Zhang_RA.D246	FAM.Zhang_RA.D246	BGI	Zhang-RA	stool	gut	0	rheumatoid_arthritis	F	42	22.0317		SAMEA2737836	70249688
SAMEA2737847	Zhang_RA.D248	FAM.Zhang_RA.D248	BGI	Zhang-RA	stool	gut	0	rheumatoid_arthritis	F	45	27.6398		SAMEA2737847	71951834
SAMEA2738141	Zhang_RA.D25	FAM.Zhang_RA.C25_S	BGI	Zhang-RA	saliva	oral	0	rheumatoid_arthritis	F	36	26.0262		SAMEA2738141	49079226
SAMEA2737694	Zhang_RA.D25	FAM.Zhang_RA.C25_S	BGI	Zhang-RA	stool	gut	0	rheumatoid_arthritis	F	36	26.0262		SAMEA2737694	62835924
SAMEA2737791	Zhang_RA.D252	FAM.Zhang_RA.C252	BGI	Zhang-RA	stool	gut	0	rheumatoid_arthritis	F	57	22.6003		SAMEA2737791	38744668
SAMEA2737809	Zhang_RA.D255	FAM.Zhang_RA.D255	BGI	Zhang-RA	stool	gut	0	rheumatoid_arthritis	F	46	26.2336		SAMEA2737809	77039500
SAMEA2737658	Zhang_RA.D264	FAM.Zhang_RA.D264	BGI	Zhang-RA	stool	gut	180	rheumatoid_arthritis	F	45	22.8928		SAMEA2737658	55098830
SAMEA2737859	Zhang_RA.D264	FAM.Zhang_RA.D264	BGI	Zhang-RA	stool	gut	0	rheumatoid_arthritis	F	45	22.8928		SAMEA2737859	73931946
SAMEA2737660	Zhang_RA.D266	FAM.Zhang_RA.D266	BGI	Zhang-RA	stool	gut	90	rheumatoid_arthritis	F	32	26.4463		SAMEA2737660	74595622
SAMEA2737678	Zhang_RA.D29	FAM.Zhang_RA.D29	BGI	Zhang-RA	stool	gut	0	rheumatoid_arthritis	M	55	25.8264		SAMEA2737678	49603434
SAMEA2737680	Zhang_RA.D31	FAM.Zhang_RA.D31	BGI	Zhang-RA	stool	gut	0	rheumatoid_arthritis	F	27	22.3081		SAMEA2737680	68452656
SAMEA2737670	Zhang_RA.D33	FAM.Zhang_RA.D33	BGI	Zhang-RA	stool	gut	0	rheumatoid_arthritis	F	51	18.026		SAMEA2737670	56108844
SAMEA2738116	Zhang_RA.D41	FAM.Zhang_RA.D41	BGI	Zhang-RA	saliva	oral	0	rheumatoid_arthritis	F	61	21.299		SAMEA2738116	40975214
SAMEA2737674	Zhang_RA.D41	FAM.Zhang_RA.D41	BGI	Zhang-RA	stool	gut	0	rheumatoid_arthritis	F	61	21.299		SAMEA2737674	50349028
SAMEA2738117	Zhang_RA.D43	FAM.Zhang_RA.D43	BGI	Zhang-RA	saliva	oral	0	rheumatoid_arthritis	F	46	22.4913		SAMEA2738117	17309934
SAMEA2738118	Zhang_RA.D44	FAM.Zhang_RA.D44	BGI	Zhang-RA	saliva	oral	0	rheumatoid_arthritis	F	41	23.6244		SAMEA2738118	8758882
SAMEA2737688	Zhang_RA.D44	FAM.Zhang_RA.D44	BGI	Zhang-RA	stool	gut	0	rheumatoid_arthritis	F	41	23.6244		SAMEA2737688	45019864
SAMEA2737654	Zhang_RA.D47	FAM.Zhang_RA.C47_S	BGI	Zhang-RA	stool	gut	0	rheumatoid_arthritis					SAMEA2737654	59983100
SAMEA2737661	Zhang_RA.D47	FAM.Zhang_RA.C47_S	BGI	Zhang-RA	stool	gut	180	rheumatoid_arthritis	F	32	20.9321		SAMEA2737661	64707260
SAMEA2737755	Zhang_RA.D49	FAM.Zhang_RA.D49	BGI	Zhang-RA	stool	gut	90	rheumatoid_arthritis	F	56	24.8016		SAMEA2737755	51170028
SAMEA2738090	Zhang_RA.D50	FAM.Zhang_RA.D50	BGI	Zhang-RA	saliva	oral	90	rheumatoid_arthritis	F	50	23.4375		SAMEA2738090	46026284
SAMEA2737748	Zhang_RA.D50	FAM.Zhang_RA.D50	BGI	Zhang-RA	stool	gut	90	rheumatoid_arthritis	F	50	23.4375		SAMEA2737748	58329126
SAMEA2738099	Zhang_RA.D51	FAM.Zhang_RA.C51_S	BGI	Zhang-RA	saliva	oral	90	rheumatoid_arthritis	F	57	22.0317		SAMEA2738099	21288978
SAMEA2738120	Zhang_RA.D51	FAM.Zhang_RA.C51_S	BGI	Zhang-RA	saliva	oral	0	rheumatoid_arthritis	F	57	22.0317		SAMEA2738120	62757222
SAMEA2737652	Zhang_RA.D51	FAM.Zhang_RA.C51_S	BGI	Zhang-RA	stool	gut	480	rheumatoid_arthritis	F	59	22.0317		SAMEA2737652	57079552
SAMEA2738122	Zhang_RA.D53	FAM.Zhang_RA.D53	BGI	Zhang-RA	saliva	oral	0	rheumatoid_arthritis	F	59	24.974		SAMEA2738122	46714190
SAMEA2737679	Zhang_RA.D53	FAM.Zhang_RA.D53	BGI	Zhang-RA	stool	gut	0	rheumatoid_arthritis	F	59	24.974		SAMEA2737679	63508230
SAMEA2738100	Zhang_RA.D54	FAM.Zhang_RA.D54	BGI	Zhang-RA	saliva	oral	90	rheumatoid_arthritis	F	44	24.4646		SAMEA2738100	31719800
SAMEA2737682	Zhang_RA.D55	FAM.Zhang_RA.D55	BGI	Zhang-RA	stool	gut	0	rheumatoid_arthritis	F	44	23.2335		SAMEA2737682	60889366
SAMEA2738123	Zhang_RA.D57	FAM.Zhang_RA.C57_S	BGI	Zhang-RA	saliva	oral	0	rheumatoid_arthritis	M	58	22.46		SAMEA2738123	45481078
SAMEA2737685	Zhang_RA.D57	FAM.Zhang_RA.C57_S	BGI	Zhang-RA	stool	gut	0	rheumatoid_arthritis	M	58	22.46		SAMEA2737685	55600256
SAMEA2738124	Zhang_RA.D60	FAM.Zhang_RA.D60	BGI	Zhang-RA	saliva	oral	0	rheumatoid_arthritis	F	50	24.6548		SAMEA2738124	73054716
SAMEA2737673	Zhang_RA.D60	FAM.Zhang_RA.D60	BGI	Zhang-RA	stool	gut	0	rheumatoid_arthritis	F	50	24.6548		SAMEA2737673	66957738
SAMEA2737765	Zhang_RA.D60	FAM.Zhang_RA.D60	BGI	Zhang-RA	stool	gut	90	rheumatoid_arthritis	F	50	24.6548		SAMEA2737765	68708254
SAMEA2738125	Zhang_RA.D62	FAM.Zhang_RA.D62	BGI	Zhang-RA	saliva	oral	0	rheumatoid_arthritis	F	47	21.2585		SAMEA2738125	78058558
SAMEA2737833	Zhang_RA.D64	FAM.Zhang_RA.D64	BGI	Zhang-RA	stool	gut	0	rheumatoid_arthritis	F	39	23.4375		SAMEA2737833	75118348
SAMEA2738139	Zhang_RA.D69	FAM.Zhang_RA.D69	BGI	Zhang-RA	saliva	oral	0	rheumatoid_arthritis	F	39	23.4375		SAMEA2738139	56823406
SAMEA2737650	Zhang_RA.D69	FAM.Zhang_RA.D69	BGI	Zhang-RA	stool	gut	480	rheumatoid_arthritis	F	39	23.4375		SAMEA2737650	58690164
SAMEA2737695	Zhang_RA.D69	FAM.Zhang_RA.D69	BGI	Zhang-RA	stool	gut	0	rheumatoid_arthritis	F	39	23.4375		SAMEA2737695	63857998
SAMEA2738143	Zhang_RA.D73	FAM.Zhang_RA.D73	BGI	Zhang-RA	saliva	oral	0	rheumatoid_arthritis	F	27	18.026		SAMEA2738143	41384860
SAMEA2737696	Zhang_RA.D73	FAM.Zhang_RA.D73	BGI	Zhang-RA	stool	gut	0	rheumatoid_arthritis	F	27	18.026		SAMEA2737696	66151710
SAMEA2737697	Zhang_RA.D77	FAM.Zhang_RA.D77	BGI	Zhang-RA	stool	gut	0	rheumatoid_arthritis	M	66	22.8374		SAMEA2737697	73008518
SAMEA2738091	Zhang_RA.D79	FAM.Zhang_RA.D79	BGI	Zhang-RA	saliva	oral	90	rheumatoid_arthritis	F	36	25.6312		SAMEA2738091	36073914
SAMEA2737676	Zhang_RA.D79	FAM.Zhang_RA.D79	BGI	Zhang-RA	stool	gut	0	rheumatoid_arthritis	F	36	25.6312		SAMEA2737676	51950850
SAMEA2737788	Zhang_RA.D79	FAM.Zhang_RA.D79	BGI	Zhang-RA	stool	gut	90	rheumatoid_arthritis	F	36	25.6312		SAMEA2737788	58851980
SAMEA2738178	Zhang_RA.D8	FAM.Zhang_RA.D8	BGI	Zhang-RA	saliva	oral	90	rheumatoid_arthritis	F	57	18.7305		SAMEA2738178	64320518
SAMEA2737725	Zhang_RA.D8	FAM.Zhang_RA.D8	BGI	Zhang-RA	stool	gut	90	rheumatoid_arthritis	F	57	18.7305		SAMEA2737725	59430170
SAMEA2737739	Zhang_RA.D80	FAM.Zhang_RA.C80_R	BGI	Zhang-RA	stool	gut	0	rheumatoid_arthritis	F	36	24.0346		SAMEA2737739	78280332
SAMEA2738126	Zhang_RA.D82	FAM.Zhang_RA.D82	BGI	Zhang-RA	saliva	oral	0	rheumatoid_arthritis	M	44	19.5918		SAMEA2738126	62945934
SAMEA2737689	Zhang_RA.D82	FAM.Zhang_RA.D82	BGI	Zhang-RA	stool	gut	0	rheumatoid_arthritis	M	44	19.5918		SAMEA2737689	74419642
SAMEA2738127	Zhang_RA.D86	FAM.Zhang_RA.D86	BGI	Zhang-RA	saliva	oral	0	rheumatoid_arthritis	F	56	26.6728		SAMEA2738127	53873120
SAMEA2737684	Zhang_RA.D86	FAM.Zhang_RA.D86	BGI	Zhang-RA	stool	gut	0	rheumatoid_arthritis	F	56	26.6728		SAMEA2737684	61220320
SAMEA2737653	Zhang_RA.D88	FAM.Zhang_RA.C88	BGI	Zhang-RA	stool	gut	0	rheumatoid_arthritis					SAMEA2737653	51017916
SAMEA2737659	Zhang_RA.D88	FAM.Zhang_RA.C88	BGI	Zhang-RA	stool	gut	180	rheumatoid_arthritis	F	38	24.0055		SAMEA2737659	53577076
SAMEA2737763	Zhang_RA.D88	FAM.Zhang_RA.C88	BGI	Zhang-RA	stool	gut	90	rheumatoid_arthritis	F	38	23.815		SAMEA2737763	71025578
SAMEA2738114	Zhang_RA.D9	FAM.Zhang_RA.C9	BGI	Zhang-RA	saliva	oral	0	rheumatoid_arthritis	F	60	15.625		SAMEA2738114	53740594
SAMEA2738129	Zhang_RA.D90	FAM.Zhang_RA.D90	BGI	Zhang-RA	saliva	oral	0	rheumatoid_arthritis	F	37	21.0938		SAMEA2738129	61381792
SAMEA2737667	Zhang_RA.D90	FAM.Zhang_RA.D90	BGI	Zhang-RA	stool	gut	180	rheumatoid_arthritis	F	37	21.0938		SAMEA2737667	65248448
SAMEA2737669	Zhang_RA.D90	FAM.Zhang_RA.D90	BGI	Zhang-RA	stool	gut	0	rheumatoid_arthritis	F	37	21.0938		SAMEA2737669	76635200
SAMEA2737756	Zhang_RA.D92	FAM.Zhang_RA.D92	BGI	Zhang-RA	stool	gut	90	rheumatoid_arthritis	F	46	22.5827		SAMEA2737756	57326354
SAMEA2738092	Zhang_RA.D93	FAM.Zhang_RA.D93	BGI	Zhang-RA	saliva	oral	90	rheumatoid_arthritis	F	57	18.2899		SAMEA2738092	37959728
SAMEA2738130	Zhang_RA.D93	FAM.Zhang_RA.D93	BGI	Zhang-RA	saliva	oral	0	rheumatoid_arthritis	F	57	18.2899		SAMEA2738130	14511462
SAMEA2737687	Zhang_RA.D93	FAM.Zhang_RA.D93	BGI	Zhang-RA	stool	gut	0	rheumatoid_arthritis	F	57	18.2899		SAMEA2737687	78325926
SAMEA2737744	Zhang_RA.D93	FAM.Zhang_RA.D93	BGI	Zhang-RA	stool	gut	90	rheumatoid_arthritis	F	57	18.2899		SAMEA2737744	73144578
SAMEA2738131	Zhang_RA.D94	FAM.Zhang_RA.D94	BGI	Zhang-RA	saliva	oral	0	rheumatoid_arthritis	F	43	20.0288		SAMEA2738131	61896858
SAMEA2738144	Zhang_RA.D98	FAM.Zhang_RA.D98	BGI	Zhang-RA	saliva	oral	0	rheumatoid_arthritis	F	54	24.974		SAMEA2738144	66232590
SAMEA2737698	Zhang_RA.D98	FAM.Zhang_RA.D98	BGI	Zhang-RA	stool	gut	0	rheumatoid_arthritis	F	54	24.974		SAMEA2737698	66863232
SAMEA2737758	Zhang_RA.D98	FAM.Zhang_RA.D98	BGI	Zhang-RA	stool	gut	90	rheumatoid_arthritis	F	54	24.974		SAMEA2737758	61917212
SAMEA2738132	Zhang_RA.D99	FAM.Zhang_RA.D99	BGI	Zhang-RA	saliva	oral	0	rheumatoid_arthritis	F	47	30.4878		SAMEA2738132	39416618
alien-11-600-0	alien	FAM.alien	EMBL	MM	stool	gut	600	control	M					135891810
alien-11-918-0	alien	FAM.alien	EMBL	MM	stool	gut	918	control	M					113242510
alien_OR_600	alien	FAM.alien	EMBL	MM	saliva	oral	600	control	M			alien-30-600-0		119680596
alien_OR_918	alien	FAM.alien	EMBL	MM	saliva	oral	918	control	M			alien-30-918-0		94233474
bugkiller-11-600-0	bugkiller	FAM.bugkiller	EMBL	MM	stool	gut	600	control	M					78042088
bugkiller-11-918-0	bugkiller	FAM.bugkiller	EMBL	MM	stool	gut	918	control	M					142753372
bugkiller-30-600-0	bugkiller	FAM.bugkiller	EMBL	MM	saliva	oral	600	control	M					118751402
bugkiller_OR_918	bugkiller	FAM.bugkiller	EMBL	MM	saliva	oral	918	control	M			bugkiller-30-918-0		117401338
daisy-11-0-0	daisy	FAM.daisy	EMBL	MM	stool	gut	0	control	F					125604326
daisy-11-392-0	daisy	FAM.daisy	EMBL	MM	stool	gut	392	control	F					161171518
daisy-29-0-0	daisy	FAM.daisy	EMBL	MM	saliva	oral	0	control	F					14975392
daisy_OR_392	daisy	FAM.daisy	EMBL	MM	saliva	oral	392	control	F			daisy-30-392-0		27368078
peacemaker-11-600-0	peacemaker	FAM.peacemaker	EMBL	MM	stool	gut	600	control	M					111779172
peacemaker-11-918-0	peacemaker	FAM.peacemaker	EMBL	MM	stool	gut	918	control	M					117669044
peacemaker-30-600-0	peacemaker	FAM.peacemaker	EMBL	MM	saliva	oral	600	control	M					94771708
peacemaker_OR_918	peacemaker	FAM.peacemaker	EMBL	MM	saliva	oral	918	control	M			peacemaker-30-918-0		128430006
tigress-29-7-0	tigress	FAM.tigress	EMBL	MM	saliva	oral	7	control	F					40622340
tigress_OR_392	tigress	FAM.tigress	EMBL	MM	saliva	oral	392	control	F			tigress-30-392-0		113001992
tigress-11-7-0	tigress	FAM.tigress	EMBL	MM	stool	gut	7	control	F					110434668
tigress-11-392-0	tigress	FAM.tigress	EMBL	MM	stool	gut	392	control	F					113429850
M01-01-V1-oral-metaG-0	LU-T1D-Wilmes.M01.1	LU-T1D-Wilmes.M01	Lux_Wilmes	LU-T1D	saliva	oral	0	diabetes_type1	M	62	25.2		SAMN04571684	431574569
M01-01-V1-stool-metaG-0	LU-T1D-Wilmes.M01.1	LU-T1D-Wilmes.M01	Lux_Wilmes	LU-T1D	stool	gut	0	diabetes_type1	M	62	25.2		SAMN09837370	47627422
M01-01-V2-oral-metaG-28	LU-T1D-Wilmes.M01.1	LU-T1D-Wilmes.M01	Lux_Wilmes	LU-T1D	saliva	oral	28	diabetes_type1	M	62	27		SAMN04571685	169626929
M01-01-V2-stool-metaG-28	LU-T1D-Wilmes.M01.1	LU-T1D-Wilmes.M01	Lux_Wilmes	LU-T1D	stool	gut	28	diabetes_type1	M	62	27		SAMN09837371	47671146
M01-01-V3-oral-metaG-63	LU-T1D-Wilmes.M01.1	LU-T1D-Wilmes.M01	Lux_Wilmes	LU-T1D	saliva	oral	63	diabetes_type1	M	62			SAMN04571686	289664272
M01-01-V3-stool-metaG-63	LU-T1D-Wilmes.M01.1	LU-T1D-Wilmes.M01	Lux_Wilmes	LU-T1D	stool	gut	63	diabetes_type1	M	62			SAMN09837372	47584466
M01-02-V1-oral-metaG-0	LU-T1D-Wilmes.M01.2	LU-T1D-Wilmes.M01	Lux_Wilmes	LU-T1D	saliva	oral	0	control	F	60	26.39		SAMN04571687	432528943
M01-02-V1-stool-metaG-0	LU-T1D-Wilmes.M01.2	LU-T1D-Wilmes.M01	Lux_Wilmes	LU-T1D	stool	gut	0	control	F	60	26.39		SAMN09837373	47619774
M01-02-V2-oral-metaG-28	LU-T1D-Wilmes.M01.2	LU-T1D-Wilmes.M01	Lux_Wilmes	LU-T1D	saliva	oral	28	control	F	60	26.24		SAMN04571688	175368267
M01-02-V2-stool-metaG-28	LU-T1D-Wilmes.M01.2	LU-T1D-Wilmes.M01	Lux_Wilmes	LU-T1D	stool	gut	28	control	F	60	26.24		SAMN09837374	47445538
M01-02-V3-oral-metaG-63	LU-T1D-Wilmes.M01.2	LU-T1D-Wilmes.M01	Lux_Wilmes	LU-T1D	saliva	oral	63	control	F	60			SAMN04571689	458830532
M01-02-V3-stool-metaG-63	LU-T1D-Wilmes.M01.2	LU-T1D-Wilmes.M01	Lux_Wilmes	LU-T1D	stool	gut	63	control	F	60			SAMN09837375	47531798
M01-03-V1-oral-metaG-0	LU-T1D-Wilmes.M01.3	LU-T1D-Wilmes.M01	Lux_Wilmes	LU-T1D	saliva	oral	0	control	F	57	37.12		SAMN04571690	315560399
M01-03-V1-stool-metaG-0	LU-T1D-Wilmes.M01.3	LU-T1D-Wilmes.M01	Lux_Wilmes	LU-T1D	stool	gut	0	control	F	57	37.12		SAMN09837376	47451810
M01-03-V2-oral-metaG-28	LU-T1D-Wilmes.M01.3	LU-T1D-Wilmes.M01	Lux_Wilmes	LU-T1D	saliva	oral	28	control	F	57	37.21		SAMN04571691	184595984
M01-03-V2-stool-metaG-28	LU-T1D-Wilmes.M01.3	LU-T1D-Wilmes.M01	Lux_Wilmes	LU-T1D	stool	gut	28	control	F	57	37.21		SAMN09837377	47349308
M01-03-V3-oral-metaG-63	LU-T1D-Wilmes.M01.3	LU-T1D-Wilmes.M01	Lux_Wilmes	LU-T1D	saliva	oral	63	control	F	57	36.99		SAMN04571692	299608225
M01-03-V3-stool-metaG-63	LU-T1D-Wilmes.M01.3	LU-T1D-Wilmes.M01	Lux_Wilmes	LU-T1D	stool	gut	63	control	F	57	36.99		SAMN09837378	48128056
M01-04-V1-oral-metaG-0	LU-T1D-Wilmes.M01.4	LU-T1D-Wilmes.M01	Lux_Wilmes	LU-T1D	saliva	oral	0	diabetes_type1	F	37	36.52		SAMN04571693	204536315
M01-04-V1-stool-metaG-0	LU-T1D-Wilmes.M01.4	LU-T1D-Wilmes.M01	Lux_Wilmes	LU-T1D	stool	gut	0	diabetes_type1	F	37	36.52		SAMN09842353	47575826
M01-04-V2-oral-metaG-28	LU-T1D-Wilmes.M01.4	LU-T1D-Wilmes.M01	Lux_Wilmes	LU-T1D	saliva	oral	28	diabetes_type1	F	37	36.33		SAMN04571694	165095987
M01-04-V2-stool-metaG-28	LU-T1D-Wilmes.M01.4	LU-T1D-Wilmes.M01	Lux_Wilmes	LU-T1D	stool	gut	28	diabetes_type1	F	37	36.33		SAMN09837379	46522780
M01-04-V3-oral-metaG-63	LU-T1D-Wilmes.M01.4	LU-T1D-Wilmes.M01	Lux_Wilmes	LU-T1D	saliva	oral	63	diabetes_type1	F	37	37.11		SAMN09837380	372709469
M01-05-V2-stool-metaG-28	LU-T1D-Wilmes.M01.5	LU-T1D-Wilmes.M01	Lux_Wilmes	LU-T1D	stool	gut	28	control	M	6	18.92		SAMN04571696	48370302
M01-05-V3-stool-metaG-63	LU-T1D-Wilmes.M01.5	LU-T1D-Wilmes.M01	Lux_Wilmes	LU-T1D	stool	gut	63	control	M	6	18.31		SAMN04571697	47409410
M02-01-V1-oral-metaG-0	LU-T1D-Wilmes.M02.1	LU-T1D-Wilmes.M02	Lux_Wilmes	LU-T1D	saliva	oral	0	diabetes_type1	M	58	23.17		SAMN04571698	60766831
M02-01-V1-stool-metaG-0	LU-T1D-Wilmes.M02.1	LU-T1D-Wilmes.M02	Lux_Wilmes	LU-T1D	stool	gut	0	diabetes_type1	M	58	23.17		SAMN09837381	46977756
M02-01-V2-oral-metaG-28	LU-T1D-Wilmes.M02.1	LU-T1D-Wilmes.M02	Lux_Wilmes	LU-T1D	saliva	oral	28	diabetes_type1	M	58	23.13		SAMN04571699	300510234
M02-01-V2-stool-metaG-28	LU-T1D-Wilmes.M02.1	LU-T1D-Wilmes.M02	Lux_Wilmes	LU-T1D	stool	gut	28	diabetes_type1	M	58	23.13		SAMN09837382	46680728
M02-01-V3-oral-metaG-56	LU-T1D-Wilmes.M02.1	LU-T1D-Wilmes.M02	Lux_Wilmes	LU-T1D	saliva	oral	56	diabetes_type1	M	58	23.25		SAMN04571700	288918108
M02-01-V3-stool-metaG-56	LU-T1D-Wilmes.M02.1	LU-T1D-Wilmes.M02	Lux_Wilmes	LU-T1D	stool	gut	56	diabetes_type1	M	58	23.25		SAMN09837383	46854772
M02-02-V1-stool-metaG-0	LU-T1D-Wilmes.M02.2	LU-T1D-Wilmes.M02	Lux_Wilmes	LU-T1D	stool	gut	0	diabetes_type1	F	24	19.54		SAMN04571701	47013992
M02-02-V2-oral-metaG-8	LU-T1D-Wilmes.M02.2	LU-T1D-Wilmes.M02	Lux_Wilmes	LU-T1D	saliva	oral	8	diabetes_type1	F	24	19.44		SAMN04571702	598109273
M02-02-V2-stool-metaG-8	LU-T1D-Wilmes.M02.2	LU-T1D-Wilmes.M02	Lux_Wilmes	LU-T1D	stool	gut	8	diabetes_type1	F	24	19.44		SAMN09837384	46431478
M02-02-V3-oral-metaG-49	LU-T1D-Wilmes.M02.2	LU-T1D-Wilmes.M02	Lux_Wilmes	LU-T1D	saliva	oral	49	diabetes_type1	F	24	19.22		SAMN04571703	246373957
M02-02-V3-stool-metaG-49	LU-T1D-Wilmes.M02.2	LU-T1D-Wilmes.M02	Lux_Wilmes	LU-T1D	stool	gut	49	diabetes_type1	F	24	19.22		SAMN09837385	46395748
M02-03-V1-oral-metaG-0	LU-T1D-Wilmes.M02.3	LU-T1D-Wilmes.M02	Lux_Wilmes	LU-T1D	saliva	oral	0	diabetes_type1	M	30	20.9		SAMN04571704	709735614
M02-03-V1-stool-metaG-0	LU-T1D-Wilmes.M02.3	LU-T1D-Wilmes.M02	Lux_Wilmes	LU-T1D	stool	gut	0	diabetes_type1	M	30	20.9		SAMN09837386	46815044
M02-03-V2-oral-metaG-28	LU-T1D-Wilmes.M02.3	LU-T1D-Wilmes.M02	Lux_Wilmes	LU-T1D	saliva	oral	28	diabetes_type1	M	30	20.23		SAMN04571705	1316823736
M02-03-V2-stool-metaG-28	LU-T1D-Wilmes.M02.3	LU-T1D-Wilmes.M02	Lux_Wilmes	LU-T1D	stool	gut	28	diabetes_type1	M	30	20.23		SAMN09837387	46716938
M02-03-V3-oral-metaG-50	LU-T1D-Wilmes.M02.3	LU-T1D-Wilmes.M02	Lux_Wilmes	LU-T1D	saliva	oral	50	diabetes_type1	M	30	20.28		SAMN04571706	1077903789
M02-03-V3-stool-metaG-50	LU-T1D-Wilmes.M02.3	LU-T1D-Wilmes.M02	Lux_Wilmes	LU-T1D	stool	gut	50	diabetes_type1	M	30	20.28		SAMN09837388	46700916
M02-04-V1-oral-metaG-0	LU-T1D-Wilmes.M02.4	LU-T1D-Wilmes.M02	Lux_Wilmes	LU-T1D	saliva	oral	0	control	F	58	20.76		SAMN04571707	809632276
M02-04-V1-stool-metaG-0	LU-T1D-Wilmes.M02.4	LU-T1D-Wilmes.M02	Lux_Wilmes	LU-T1D	stool	gut	0	control	F	58	20.76		SAMN09837389	46487514
M02-04-V2-stool-metaG-28	LU-T1D-Wilmes.M02.4	LU-T1D-Wilmes.M02	Lux_Wilmes	LU-T1D	stool	gut	28	control	F	58	20.59		SAMN04571708	46337818
M02-04-V3-oral-metaG-56	LU-T1D-Wilmes.M02.4	LU-T1D-Wilmes.M02	Lux_Wilmes	LU-T1D	saliva	oral	56	control	F	58	20.57		SAMN04571709	114097357
M02-04-V3-stool-metaG-56	LU-T1D-Wilmes.M02.4	LU-T1D-Wilmes.M02	Lux_Wilmes	LU-T1D	stool	gut	56	control	F	58	20.57		SAMN09837391	47411166
M02-05-V1-oral-metaG-0	LU-T1D-Wilmes.M02.5	LU-T1D-Wilmes.M02	Lux_Wilmes	LU-T1D	saliva	oral	0	diabetes_type1	F	28	21.37		SAMN04571710	321017950
M02-05-V1-stool-metaG-0	LU-T1D-Wilmes.M02.5	LU-T1D-Wilmes.M02	Lux_Wilmes	LU-T1D	stool	gut	0	diabetes_type1	F	28	21.37		SAMN09837392	46270536
M02-05-V2-stool-metaG-22	LU-T1D-Wilmes.M02.5	LU-T1D-Wilmes.M02	Lux_Wilmes	LU-T1D	stool	gut	22	diabetes_type1	F	28	21.05		SAMN04571711	47906942
M03-01-V2-oral-metaG-0	LU-T1D-Wilmes.M03.1	LU-T1D-Wilmes.M03	Lux_Wilmes	LU-T1D	saliva	oral	35	control	F	50	16.93		SAMN04571712	926597000
M03-01-V2-stool-metaG-35	LU-T1D-Wilmes.M03.1	LU-T1D-Wilmes.M03	Lux_Wilmes	LU-T1D	stool	gut	35	control	F	50	16.93		SAMN09842354	47013318
M03-01-V3-oral-metaG-28	LU-T1D-Wilmes.M03.1	LU-T1D-Wilmes.M03	Lux_Wilmes	LU-T1D	saliva	oral	63	control	F	50	17.03		SAMN04571713	905185201
M03-01-V3-stool-metaG-63	LU-T1D-Wilmes.M03.1	LU-T1D-Wilmes.M03	Lux_Wilmes	LU-T1D	stool	gut	63	control	F	50	17.03		SAMN09842355	47133708
M03-03-V1-oral-metaG-0	LU-T1D-Wilmes.M03.3	LU-T1D-Wilmes.M03	Lux_Wilmes	LU-T1D	saliva	oral	0	control	F	14	19.72		SAMN04571714	1038929469
M03-03-V1-stool-metaG-0	LU-T1D-Wilmes.M03.3	LU-T1D-Wilmes.M03	Lux_Wilmes	LU-T1D	stool	gut	0	control	F	14	19.72		SAMN09842356	47162834
M03-03-V2-oral-metaG-35	LU-T1D-Wilmes.M03.3	LU-T1D-Wilmes.M03	Lux_Wilmes	LU-T1D	saliva	oral	35	control	F	14	18.65		SAMN04571715	1425060022
M03-03-V2-stool-metaG-35	LU-T1D-Wilmes.M03.3	LU-T1D-Wilmes.M03	Lux_Wilmes	LU-T1D	stool	gut	35	control	F	14	18.65		SAMN09842357	47231460
M03-03-V3-oral-metaG-63	LU-T1D-Wilmes.M03.3	LU-T1D-Wilmes.M03	Lux_Wilmes	LU-T1D	saliva	oral	63	control	F	14	19.86		SAMN04571716	1190596952
M03-03-V3-stool-metaG-63	LU-T1D-Wilmes.M03.3	LU-T1D-Wilmes.M03	Lux_Wilmes	LU-T1D	stool	gut	63	control	F	14	19.86		SAMN09837394	47310288
M03-04-V1-oral-metaG-0	LU-T1D-Wilmes.M03.4	LU-T1D-Wilmes.M03	Lux_Wilmes	LU-T1D	saliva	oral	0	diabetes_type1	F	17	21.07		SAMN04571717	958755634
M03-04-V1-stool-metaG-0	LU-T1D-Wilmes.M03.4	LU-T1D-Wilmes.M03	Lux_Wilmes	LU-T1D	stool	gut	0	diabetes_type1	F	17	21.07		SAMN09842358	47026502
M03-04-V2-oral-metaG-35	LU-T1D-Wilmes.M03.4	LU-T1D-Wilmes.M03	Lux_Wilmes	LU-T1D	saliva	oral	35	diabetes_type1	F	17	20.57		SAMN04571718	563581115
M03-04-V2-stool-metaG-35	LU-T1D-Wilmes.M03.4	LU-T1D-Wilmes.M03	Lux_Wilmes	LU-T1D	stool	gut	35	diabetes_type1	F	17	20.57		SAMN09837395	47203998
M03-04-V3-oral-metaG-63	LU-T1D-Wilmes.M03.4	LU-T1D-Wilmes.M03	Lux_Wilmes	LU-T1D	saliva	oral	63	diabetes_type1	F	17	20.51		SAMN09842359	317102332
M03-05-V1-oral-metaG-0	LU-T1D-Wilmes.M03.5	LU-T1D-Wilmes.M03	Lux_Wilmes	LU-T1D	saliva	oral	0	diabetes_type1	F	19	24.54		SAMN04571720	1202217521
M03-05-V1-stool-metaG-0	LU-T1D-Wilmes.M03.5	LU-T1D-Wilmes.M03	Lux_Wilmes	LU-T1D	stool	gut	0	diabetes_type1	F	19	24.54		SAMN09837396	47325152
M03-05-V2-stool-metaG-34	LU-T1D-Wilmes.M03.5	LU-T1D-Wilmes.M03	Lux_Wilmes	LU-T1D	stool	gut	34	diabetes_type1	F	19			SAMN04571721	47565944
M04-01-V1-oral-metaG-0	LU-T1D-Wilmes.M04.1	LU-T1D-Wilmes.M04	Lux_Wilmes	LU-T1D	saliva	oral	0	control	F	34	38.48		SAMN09842360	185974227
M04-01-V3-oral-metaG-77	LU-T1D-Wilmes.M04.1	LU-T1D-Wilmes.M04	Lux_Wilmes	LU-T1D	saliva	oral	77	control	F	34	37.96		SAMN04571723	138300839
M04-01-V3-stool-metaG-77	LU-T1D-Wilmes.M04.1	LU-T1D-Wilmes.M04	Lux_Wilmes	LU-T1D	stool	gut	77	control	F	34	37.96		SAMN09837397	46463078
M04-02-V1-oral-metaG-0	LU-T1D-Wilmes.M04.2	LU-T1D-Wilmes.M04	Lux_Wilmes	LU-T1D	saliva	oral	0	diabetes_type1	M	5	14.01		SAMN04571724	258204018
M04-02-V1-stool-metaG-0	LU-T1D-Wilmes.M04.2	LU-T1D-Wilmes.M04	Lux_Wilmes	LU-T1D	stool	gut	0	diabetes_type1	M	5	14.01		SAMN09842361	45424832
M04-02-V2-oral-metaG-42	LU-T1D-Wilmes.M04.2	LU-T1D-Wilmes.M04	Lux_Wilmes	LU-T1D	saliva	oral	42	diabetes_type1	M	5	14.01		SAMN04571725	56398286
M04-02-V2-stool-metaG-42	LU-T1D-Wilmes.M04.2	LU-T1D-Wilmes.M04	Lux_Wilmes	LU-T1D	stool	gut	42	diabetes_type1	M	5	14.01		SAMN09837398	48100120
M04-02-V3-oral-metaG-76	LU-T1D-Wilmes.M04.2	LU-T1D-Wilmes.M04	Lux_Wilmes	LU-T1D	saliva	oral	76	diabetes_type1	M	5	14.01		SAMN04571726	404467117
M04-02-V3-stool-metaG-76	LU-T1D-Wilmes.M04.2	LU-T1D-Wilmes.M04	Lux_Wilmes	LU-T1D	stool	gut	76	diabetes_type1	M	5	14.01		SAMN09837399	47659582
M04-03-V1-stool-metaG-0	LU-T1D-Wilmes.M04.3	LU-T1D-Wilmes.M04	Lux_Wilmes	LU-T1D	stool	gut	0	diabetes_type1	M	9	24.47		SAMN04571727	47476224
M04-03-V3-oral-metaG-78	LU-T1D-Wilmes.M04.3	LU-T1D-Wilmes.M04	Lux_Wilmes	LU-T1D	saliva	oral	78	diabetes_type1	M	9	24.57		SAMN04571728	1230027357
M04-03-V3-stool-metaG-78	LU-T1D-Wilmes.M04.3	LU-T1D-Wilmes.M04	Lux_Wilmes	LU-T1D	stool	gut	78	diabetes_type1	M	9	24.57		SAMN09842362	47484224
M04-04-V1-oral-metaG-0	LU-T1D-Wilmes.M04.4	LU-T1D-Wilmes.M04	Lux_Wilmes	LU-T1D	saliva	oral	0	control	F	12	29.9		SAMN04571729	774851264
M04-04-V1-stool-metaG-0	LU-T1D-Wilmes.M04.4	LU-T1D-Wilmes.M04	Lux_Wilmes	LU-T1D	stool	gut	0	control	F	12	29.9		SAMN09837401	46962020
M04-04-V3-oral-metaG-78	LU-T1D-Wilmes.M04.4	LU-T1D-Wilmes.M04	Lux_Wilmes	LU-T1D	saliva	oral	78	control	F	12	29.84		SAMN04571730	684444394
M04-04-V3-stool-metaG-78	LU-T1D-Wilmes.M04.4	LU-T1D-Wilmes.M04	Lux_Wilmes	LU-T1D	stool	gut	78	control	F	12	29.84		SAMN09837402	46534298
M04-05-V1-oral-metaG-0	LU-T1D-Wilmes.M04.5	LU-T1D-Wilmes.M04	Lux_Wilmes	LU-T1D	saliva	oral	0	control	F	16	29.32		SAMN04571731	26720164
M04-05-V1-stool-metaG-0	LU-T1D-Wilmes.M04.5	LU-T1D-Wilmes.M04	Lux_Wilmes	LU-T1D	stool	gut	0	control	F	16	29.32		SAMN09842363	47235216
M04-05-V2-oral-metaG-49	LU-T1D-Wilmes.M04.5	LU-T1D-Wilmes.M04	Lux_Wilmes	LU-T1D	saliva	oral	49	control	F	16			SAMN09842364	616608587
M04-05-V3-oral-metaG-113	LU-T1D-Wilmes.M04.5	LU-T1D-Wilmes.M04	Lux_Wilmes	LU-T1D	saliva	oral	113	control	F	16	28.7		SAMN04571733	605549009
M04-05-V3-stool-metaG-113	LU-T1D-Wilmes.M04.5	LU-T1D-Wilmes.M04	Lux_Wilmes	LU-T1D	stool	gut	113	control	F	16	28.7		SAMN09837403	46950978
M04-06-V1-oral-metaG-0	LU-T1D-Wilmes.M04.6	LU-T1D-Wilmes.M04	Lux_Wilmes	LU-T1D	saliva	oral	0	control	M	43	35.35		SAMN04571734	202347763
M04-06-V1-stool-metaG-0	LU-T1D-Wilmes.M04.6	LU-T1D-Wilmes.M04	Lux_Wilmes	LU-T1D	stool	gut	0	control	M	43	35.35		SAMN09842365	46922158
M04-06-V2-oral-metaG-27	LU-T1D-Wilmes.M04.6	LU-T1D-Wilmes.M04	Lux_Wilmes	LU-T1D	saliva	oral	27	control	M	43	34.89		SAMN04571735	242523030
M04-06-V2-stool-metaG-27	LU-T1D-Wilmes.M04.6	LU-T1D-Wilmes.M04	Lux_Wilmes	LU-T1D	stool	gut	27	control	M	43	34.89		SAMN09837404	45672056
M04-06-V3-oral-metaG-64	LU-T1D-Wilmes.M04.6	LU-T1D-Wilmes.M04	Lux_Wilmes	LU-T1D	saliva	oral	64	control	M	43	35.82		SAMN04571736	379480573
M04-06-V3-stool-metaG-64	LU-T1D-Wilmes.M04.6	LU-T1D-Wilmes.M04	Lux_Wilmes	LU-T1D	stool	gut	64	control	M	43	35.82		SAMN09837405	47078058
M05-01-V1-oral-metaG-0	LU-T1D-Wilmes.M05.1	LU-T1D-Wilmes.M05	Lux_Wilmes	LU-T1D	saliva	oral	0	diabetes_type1	M	49	25.44		SAMN09837406	891407706
M05-01-V2-oral-metaG-28	LU-T1D-Wilmes.M05.1	LU-T1D-Wilmes.M05	Lux_Wilmes	LU-T1D	saliva	oral	28	diabetes_type1	M	49	25.28		SAMN09837407	732771810
M05-02-V1-oral-metaG-0	LU-T1D-Wilmes.M05.2	LU-T1D-Wilmes.M05	Lux_Wilmes	LU-T1D	saliva	oral	0	control	F	45	23.67		SAMN09837327	437614625
M05-02-V1-stool-metaG-0	LU-T1D-Wilmes.M05.2	LU-T1D-Wilmes.M05	Lux_Wilmes	LU-T1D	stool	gut	0	control	F	45	23.67		SAMN09837408	2415550393
M05-02-V2-oral-metaG-28	LU-T1D-Wilmes.M05.2	LU-T1D-Wilmes.M05	Lux_Wilmes	LU-T1D	saliva	oral	28	control	F	45	23.53		SAMN09837328	219292975
M05-02-V2-stool-metaG-28	LU-T1D-Wilmes.M05.2	LU-T1D-Wilmes.M05	Lux_Wilmes	LU-T1D	stool	gut	28	control	F	45	23.53		SAMN09837409	2315124780
M05-02-V3-stool-metaG-63	LU-T1D-Wilmes.M05.2	LU-T1D-Wilmes.M05	Lux_Wilmes	LU-T1D	stool	gut	63	control	F	45	23.35		SAMN09837329	2585305332
M05-03-V1-oral-metaG-0	LU-T1D-Wilmes.M05.3	LU-T1D-Wilmes.M05	Lux_Wilmes	LU-T1D	saliva	oral	0	control	F	15	19.95		SAMN09837330	284105736
M05-03-V1-stool-metaG-0	LU-T1D-Wilmes.M05.3	LU-T1D-Wilmes.M05	Lux_Wilmes	LU-T1D	stool	gut	0	control	F	15	19.95		SAMN09837410	2592327743
M05-03-V2-oral-metaG-28	LU-T1D-Wilmes.M05.3	LU-T1D-Wilmes.M05	Lux_Wilmes	LU-T1D	saliva	oral	28	control	F	15	19.68		SAMN09837331	414117527
M05-03-V2-stool-metaG-28	LU-T1D-Wilmes.M05.3	LU-T1D-Wilmes.M05	Lux_Wilmes	LU-T1D	stool	gut	28	control	F	15	19.68		SAMN09837411	1950285050
M05-03-V3-oral-metaG-63	LU-T1D-Wilmes.M05.3	LU-T1D-Wilmes.M05	Lux_Wilmes	LU-T1D	saliva	oral	63	control	F	15	19.75		SAMN09837332	520549150
M05-03-V3-stool-metaG-63	LU-T1D-Wilmes.M05.3	LU-T1D-Wilmes.M05	Lux_Wilmes	LU-T1D	stool	gut	63	control	F	15	19.75		SAMN09837412	3276923326
M05-04-V1-oral-metaG-0	LU-T1D-Wilmes.M05.4	LU-T1D-Wilmes.M05	Lux_Wilmes	LU-T1D	saliva	oral	0	diabetes_type1	M	13	18.79		SAMN09837333	452302589
M05-04-V1-stool-metaG-0	LU-T1D-Wilmes.M05.4	LU-T1D-Wilmes.M05	Lux_Wilmes	LU-T1D	stool	gut	0	diabetes_type1	M	13	18.79		SAMN09837413	1859489423
M05-04-V2-oral-metaG-28	LU-T1D-Wilmes.M05.4	LU-T1D-Wilmes.M05	Lux_Wilmes	LU-T1D	saliva	oral	28	diabetes_type1	M	13	17.84		SAMN09837334	344140516
M05-04-V2-stool-metaG-28	LU-T1D-Wilmes.M05.4	LU-T1D-Wilmes.M05	Lux_Wilmes	LU-T1D	stool	gut	28	diabetes_type1	M	13	17.84		SAMN09837414	2958694471
M05-04-V3-oral-metaG-63	LU-T1D-Wilmes.M05.4	LU-T1D-Wilmes.M05	Lux_Wilmes	LU-T1D	saliva	oral	63	diabetes_type1	M	13	18.12		SAMN09837335	842004068
M05-04-V3-stool-metaG-63	LU-T1D-Wilmes.M05.4	LU-T1D-Wilmes.M05	Lux_Wilmes	LU-T1D	stool	gut	63	diabetes_type1	M	13	18.12		SAMN09837415	2117870558
M06-01-V1-stool-metaG-0	LU-T1D-Wilmes.M06.1	LU-T1D-Wilmes.M06	Lux_Wilmes	LU-T1D	stool	gut	0	control	M	35	29.22		SAMN09837336	1870840590
M06-01-V2-oral-metaG-28	LU-T1D-Wilmes.M06.1	LU-T1D-Wilmes.M06	Lux_Wilmes	LU-T1D	saliva	oral	28	control	M	35	29		SAMN09837337	118049076
M06-01-V2-stool-metaG-28	LU-T1D-Wilmes.M06.1	LU-T1D-Wilmes.M06	Lux_Wilmes	LU-T1D	stool	gut	28	control	M	35	29		SAMN09837416	3012080624
M06-02-V1-oral-metaG-0	LU-T1D-Wilmes.M06.2	LU-T1D-Wilmes.M06	Lux_Wilmes	LU-T1D	saliva	oral	0	diabetes_type1	F	37	19.48		SAMN09837338	675157983
M06-02-V1-stool-metaG-0	LU-T1D-Wilmes.M06.2	LU-T1D-Wilmes.M06	Lux_Wilmes	LU-T1D	stool	gut	0	diabetes_type1	F	37	19.48		SAMN09837417	1528151536
M06-02-V3-oral-metaG-56	LU-T1D-Wilmes.M06.2	LU-T1D-Wilmes.M06	Lux_Wilmes	LU-T1D	saliva	oral	56	diabetes_type1	F	37	24.41		SAMN09837339	612623190
M06-02-V3-stool-metaG-56	LU-T1D-Wilmes.M06.2	LU-T1D-Wilmes.M06	Lux_Wilmes	LU-T1D	stool	gut	56	diabetes_type1	F	37	24.41		SAMN09837418	3575081263
M06-03-V1-oral-metaG-0	LU-T1D-Wilmes.M06.3	LU-T1D-Wilmes.M06	Lux_Wilmes	LU-T1D	saliva	oral	0	diabetes_type1	M	14	16.11		SAMN09837340	534012193
M06-03-V1-stool-metaG-0	LU-T1D-Wilmes.M06.3	LU-T1D-Wilmes.M06	Lux_Wilmes	LU-T1D	stool	gut	0	diabetes_type1	M	14	16.11		SAMN09837419	3324156304
M06-03-V2-oral-metaG-28	LU-T1D-Wilmes.M06.3	LU-T1D-Wilmes.M06	Lux_Wilmes	LU-T1D	saliva	oral	28	control	M	14	15.19		SAMN09842366	929541264
M06-04-V2-stool-metaG-0	LU-T1D-Wilmes.M06.4	LU-T1D-Wilmes.M06	Lux_Wilmes	LU-T1D	stool	gut	28	control	F	10	17.51		SAMN09837341	2198812114
M06-04-V3-oral-metaG-28	LU-T1D-Wilmes.M06.4	LU-T1D-Wilmes.M06	Lux_Wilmes	LU-T1D	saliva	oral	56	control	F	10	18		SAMN09837342	665615845
M06-04-V3-stool-metaG-28	LU-T1D-Wilmes.M06.4	LU-T1D-Wilmes.M06	Lux_Wilmes	LU-T1D	stool	gut	56	control	F	10	18		SAMN09837421	3682520357
M08-01-V1-stool-metaG-0	LU-T1D-Wilmes.M08.1	LU-T1D-Wilmes.M08	Lux_Wilmes	LU-T1D	stool	gut	0	diabetes_type1	M	40	28.8		SAMN09837343	2837289342
M08-01-V2-oral-metaG-28	LU-T1D-Wilmes.M08.1	LU-T1D-Wilmes.M08	Lux_Wilmes	LU-T1D	saliva	oral	28	diabetes_type1	M	40	29.04		SAMN09837344	266623736
M08-01-V2-stool-metaG-28	LU-T1D-Wilmes.M08.1	LU-T1D-Wilmes.M08	Lux_Wilmes	LU-T1D	stool	gut	28	diabetes_type1	M	40	29.04		SAMN09837423	2450472474
M08-01-V3-oral-metaG-56	LU-T1D-Wilmes.M08.1	LU-T1D-Wilmes.M08	Lux_Wilmes	LU-T1D	saliva	oral	56	diabetes_type1	M	40	28.9		SAMN09837345	484637630
M08-01-V3-stool-metaG-56	LU-T1D-Wilmes.M08.1	LU-T1D-Wilmes.M08	Lux_Wilmes	LU-T1D	stool	gut	56	diabetes_type1	M	40	28.9		SAMN09837424	3739467088
M08-02-V1-oral-metaG-0	LU-T1D-Wilmes.M08.2	LU-T1D-Wilmes.M08	Lux_Wilmes	LU-T1D	saliva	oral	0	control	F	36	31.72		SAMN09837346	308676695
M08-02-V1-stool-metaG-0	LU-T1D-Wilmes.M08.2	LU-T1D-Wilmes.M08	Lux_Wilmes	LU-T1D	stool	gut	0	control	F	36	31.72		SAMN09837425	1714070220
M08-02-V2-oral-metaG-28	LU-T1D-Wilmes.M08.2	LU-T1D-Wilmes.M08	Lux_Wilmes	LU-T1D	saliva	oral	28	control	F	36	31.83		SAMN09837347	209568503
M08-02-V2-stool-metaG-28	LU-T1D-Wilmes.M08.2	LU-T1D-Wilmes.M08	Lux_Wilmes	LU-T1D	stool	gut	28	control	F	36	31.83		SAMN09837426	1980064799
M08-02-V3-oral-metaG-56	LU-T1D-Wilmes.M08.2	LU-T1D-Wilmes.M08	Lux_Wilmes	LU-T1D	saliva	oral	56	control	F	36	31.51		SAMN09837348	518158876
M08-02-V3-stool-metaG-56	LU-T1D-Wilmes.M08.2	LU-T1D-Wilmes.M08	Lux_Wilmes	LU-T1D	stool	gut	56	control	F	36	31.51		SAMN09837427	2415008673
M08-03-V1-oral-metaG-0	LU-T1D-Wilmes.M08.3	LU-T1D-Wilmes.M08	Lux_Wilmes	LU-T1D	saliva	oral	0	control	M	5	15.4		SAMN09837349	1017443175
M08-03-V1-stool-metaG-0	LU-T1D-Wilmes.M08.3	LU-T1D-Wilmes.M08	Lux_Wilmes	LU-T1D	stool	gut	0	control	M	5	15.4		SAMN09837428	1954357925
M08-03-V2-oral-metaG-28	LU-T1D-Wilmes.M08.3	LU-T1D-Wilmes.M08	Lux_Wilmes	LU-T1D	saliva	oral	28	control	M	5	14.96		SAMN09837350	674102498
M08-03-V2-stool-metaG-28	LU-T1D-Wilmes.M08.3	LU-T1D-Wilmes.M08	Lux_Wilmes	LU-T1D	stool	gut	28	control	M	5	14.96		SAMN09837429	2940379451
M08-04-V2-oral-metaG-0	LU-T1D-Wilmes.M08.4	LU-T1D-Wilmes.M08	Lux_Wilmes	LU-T1D	saliva	oral	28	diabetes_type1	M	3	17.18		SAMN09837351	1508332475
M08-04-V2-stool-metaG-0	LU-T1D-Wilmes.M08.4	LU-T1D-Wilmes.M08	Lux_Wilmes	LU-T1D	stool	gut	28	diabetes_type1	M	3	17.18		SAMN09837430	3418457365
M08-04-V3-oral-metaG-28	LU-T1D-Wilmes.M08.4	LU-T1D-Wilmes.M08	Lux_Wilmes	LU-T1D	saliva	oral	56	diabetes_type1	M	3	17.09		SAMN09837352	1371218247
M08-04-V3-stool-metaG-28	LU-T1D-Wilmes.M08.4	LU-T1D-Wilmes.M08	Lux_Wilmes	LU-T1D	stool	gut	56	diabetes_type1	M	3	17.09		SAMN09837431	1636042371
M11-01-V1-oral-metaG-0	LU-T1D-Wilmes.M11.1	LU-T1D-Wilmes.M11	Lux_Wilmes	LU-T1D	saliva	oral	0	diabetes_type1	F	29	24.43		SAMN09837353	75237279
M11-01-V1-stool-metaG-0	LU-T1D-Wilmes.M11.1	LU-T1D-Wilmes.M11	Lux_Wilmes	LU-T1D	stool	gut	0	diabetes_type1	F	29	24.43		SAMN09837432	1405514501
M11-01-V2-oral-metaG-35	LU-T1D-Wilmes.M11.1	LU-T1D-Wilmes.M11	Lux_Wilmes	LU-T1D	saliva	oral	35	diabetes_type1	F	29	26.52		SAMN09837354	113752252
M11-01-V2-stool-metaG-35	LU-T1D-Wilmes.M11.1	LU-T1D-Wilmes.M11	Lux_Wilmes	LU-T1D	stool	gut	35	diabetes_type1	F	29	26.52		SAMN09837433	2405045500
M11-01-V3-oral-metaG-84	LU-T1D-Wilmes.M11.1	LU-T1D-Wilmes.M11	Lux_Wilmes	LU-T1D	saliva	oral	84	diabetes_type1	F	29	25.77		SAMN09837355	52207907
M11-01-V3-stool-metaG-84	LU-T1D-Wilmes.M11.1	LU-T1D-Wilmes.M11	Lux_Wilmes	LU-T1D	stool	gut	84	diabetes_type1	F	29	25.77		SAMN09837434	1339733754
M11-03-V1-stool-metaG-0	LU-T1D-Wilmes.M11.3	LU-T1D-Wilmes.M11	Lux_Wilmes	LU-T1D	stool	gut	0	diabetes_type1	F	2	18.68		SAMN09837356	1802552090
M11-03-V2-stool-metaG-35	LU-T1D-Wilmes.M11.3	LU-T1D-Wilmes.M11	Lux_Wilmes	LU-T1D	stool	gut	35	diabetes_type1	F	2	17.23		SAMN09837357	1258684157
M11-04-V1-oral-metaG-0	LU-T1D-Wilmes.M11.4	LU-T1D-Wilmes.M11	Lux_Wilmes	LU-T1D	saliva	oral	0	control	M	57	22.15		SAMN09837358	86089353
M11-04-V1-stool-metaG-0	LU-T1D-Wilmes.M11.4	LU-T1D-Wilmes.M11	Lux_Wilmes	LU-T1D	stool	gut	0	control	M	57	22.15		SAMN09837435	1207221098
M11-04-V2-oral-metaG-35	LU-T1D-Wilmes.M11.4	LU-T1D-Wilmes.M11	Lux_Wilmes	LU-T1D	saliva	oral	35	control	M	57	22.12		SAMN09837359	585480442
M11-04-V2-stool-metaG-35	LU-T1D-Wilmes.M11.4	LU-T1D-Wilmes.M11	Lux_Wilmes	LU-T1D	stool	gut	35	control	M	57	22.12		SAMN09837436	1391686223
M11-04-V3-oral-metaG-63	LU-T1D-Wilmes.M11.4	LU-T1D-Wilmes.M11	Lux_Wilmes	LU-T1D	saliva	oral	63	control	M	57	21.51		SAMN09837360	662779754
M11-04-V3-stool-metaG-63	LU-T1D-Wilmes.M11.4	LU-T1D-Wilmes.M11	Lux_Wilmes	LU-T1D	stool	gut	63	control	M	57	21.51		SAMN09837437	1033392737
M11-05-V1-oral-metaG-0	LU-T1D-Wilmes.M11.5	LU-T1D-Wilmes.M11	Lux_Wilmes	LU-T1D	saliva	oral	0	control	F	53	25.89		SAMN09837361	954946541
M11-05-V1-stool-metaG-0	LU-T1D-Wilmes.M11.5	LU-T1D-Wilmes.M11	Lux_Wilmes	LU-T1D	stool	gut	0	control	F	53	25.89		SAMN09837438	1416669818
M11-05-V2-oral-metaG-35	LU-T1D-Wilmes.M11.5	LU-T1D-Wilmes.M11	Lux_Wilmes	LU-T1D	saliva	oral	35	control	F	53	25.48		SAMN09837362	165711795
M11-05-V2-stool-metaG-35	LU-T1D-Wilmes.M11.5	LU-T1D-Wilmes.M11	Lux_Wilmes	LU-T1D	stool	gut	35	control	F	53	25.48		SAMN09837439	2041649669
M11-05-V3-oral-metaG-63	LU-T1D-Wilmes.M11.5	LU-T1D-Wilmes.M11	Lux_Wilmes	LU-T1D	saliva	oral	63	control	F	53	25.15		SAMN09837363	172787141
M11-05-V3-stool-metaG-63	LU-T1D-Wilmes.M11.5	LU-T1D-Wilmes.M11	Lux_Wilmes	LU-T1D	stool	gut	63	control	F	53	25.15		SAMN09837440	2437005055
M11-06-V1-oral-metaG-0	LU-T1D-Wilmes.M11.6	LU-T1D-Wilmes.M11	Lux_Wilmes	LU-T1D	saliva	oral	0	control	M	72	31		SAMN09837364	378315772
M11-06-V1-stool-metaG-0	LU-T1D-Wilmes.M11.6	LU-T1D-Wilmes.M11	Lux_Wilmes	LU-T1D	stool	gut	0	control	M	72	31		SAMN09837441	2025074861
M11-06-V2-oral-metaG-35	LU-T1D-Wilmes.M11.6	LU-T1D-Wilmes.M11	Lux_Wilmes	LU-T1D	saliva	oral	35	control	M	72	30.12		SAMN09837365	309839240
M11-06-V2-stool-metaG-35	LU-T1D-Wilmes.M11.6	LU-T1D-Wilmes.M11	Lux_Wilmes	LU-T1D	stool	gut	35	control	M	72	30.12		SAMN09837442	2326100364
M11-06-V3-stool-metaG-63	LU-T1D-Wilmes.M11.6	LU-T1D-Wilmes.M11	Lux_Wilmes	LU-T1D	stool	gut	63	control	M	72	30.12		SAMN09837366	1336564056
M11-07-V1-oral-metaG-0	LU-T1D-Wilmes.M11.7	LU-T1D-Wilmes.M11	Lux_Wilmes	LU-T1D	saliva	oral	0	control	F	69	29.94		SAMN09837367	40005720
M11-07-V1-stool-metaG-0	LU-T1D-Wilmes.M11.7	LU-T1D-Wilmes.M11	Lux_Wilmes	LU-T1D	stool	gut	0	control	F	69	29.94		SAMN09837443	3545724720
M11-07-V2-oral-metaG-35	LU-T1D-Wilmes.M11.7	LU-T1D-Wilmes.M11	Lux_Wilmes	LU-T1D	saliva	oral	35	control	F	69	29.45		SAMN09837368	117524292
M11-07-V2-stool-metaG-35	LU-T1D-Wilmes.M11.7	LU-T1D-Wilmes.M11	Lux_Wilmes	LU-T1D	stool	gut	35	control	F	69	29.45		SAMN09837444	3895823560
M11-07-V3-stool-metaG-63	LU-T1D-Wilmes.M11.7	LU-T1D-Wilmes.M11	Lux_Wilmes	LU-T1D	stool	gut	63	control	F	69	29.34		SAMN09837369	4187863882
CCIS43800109OR-31-0	FR-039	FAM.FR-039	EMBL	FR-CRC	saliva	oral	0	control	M	65	30			98930108
CCIS79210440ST-3-0	FR-039	FAM.FR-039	EMBL	FR-CRC	stool	gut	0	control	M	65	30			88044282
CCIS61885627OR-31-0	FR-125	FAM.FR-125	EMBL	FR-CRC	saliva	oral	0	CRC	F	72	37			29778736
CCIS17669415ST-4-0	FR-125	FAM.FR-125	EMBL	FR-CRC	stool	gut	0	CRC	F	72	37			139966938
CCIS47019864OR-31-0	FR-129	FAM.FR-129	EMBL	FR-CRC	saliva	oral	0	control	F	63	27			69430480
CCIS34604008ST-4-0	FR-129	FAM.FR-129	EMBL	FR-CRC	stool	gut	0	control	F	63	27			142294236
CCIS11035283OR-31-0	FR-132	FAM.FR-132	EMBL	FR-CRC	saliva	oral	0	control	F	69	25			102582146
CCIS63468405ST-4-0	FR-132	FAM.FR-132	EMBL	FR-CRC	stool	gut	0	control	F	69	25			134790790
CCIS24962602OR-31-0	FR-142	FAM.FR-142	EMBL	FR-CRC	saliva	oral	0	control	F	68	25			51542844
CCIS36699628ST-4-0	FR-142	FAM.FR-142	EMBL	FR-CRC	stool	gut	0	control	F	68	25			132913402
CCIS33977131OR-31-0	FR-152	FAM.FR-152	EMBL	FR-CRC	saliva	oral	0	control	F	63	21			174081700
CCIS95409808ST-4-0	FR-152	FAM.FR-152	EMBL	FR-CRC	stool	gut	0	control	F	63	21			133731486
CCIS32916603OR-31-0	FR-166	FAM.FR-166	EMBL	FR-CRC	saliva	oral	0	control	M	64	27			54557584
CCIS29210128ST-4-0	FR-166	FAM.FR-166	EMBL	FR-CRC	stool	gut	0	control	M	64	27			96550910
CCIS57305364OR-31-0	FR-170	FAM.FR-170	EMBL	FR-CRC	saliva	oral	0	CRC	F	62	21			67024382
CCIS48725289ST-4-0	FR-170	FAM.FR-170	EMBL	FR-CRC	stool	gut	0	CRC	F	62	21			71943560
CCIS87463221OR-31-0	FR-198	FAM.FR-198	EMBL	FR-CRC	saliva	oral	0	control	M	63	25			122980600
CCIS36797902ST-4-0	FR-198	FAM.FR-198	EMBL	FR-CRC	stool	gut	0	control	M	63	25			86112926
CCIS95316286OR-31-0	FR-213	FAM.FR-213	EMBL	FR-CRC	saliva	oral	0	control	F	61	23			98950592
CCIS50471204ST-4-0	FR-213	FAM.FR-213	EMBL	FR-CRC	stool	gut	0	control	F	61	23			162930178
CCIS55038961OR-4-0	FR-223	FAM.FR-223	EMBL	FR-CRC	saliva	oral	0	CRC	M	79	30			32446018
CCIS87167916ST-4-0	FR-223	FAM.FR-223	EMBL	FR-CRC	stool	gut	0	CRC	M	79	30			100409414
CCIS31468964OR-4-0	FR-281	FAM.FR-281	EMBL	FR-CRC	saliva	oral	0	CRC	F	50	24			5511218
CCIS71301801ST-4-0	FR-281	FAM.FR-281	EMBL	FR-CRC	stool	gut	0	CRC	F	50	24			191343336
CCIS80963101OR-31-0	FR-302	FAM.FR-302	EMBL	FR-CRC	saliva	oral	0	CRC	M	59	27			34636120
CCIS81887263ST-4-0	FR-302	FAM.FR-302	EMBL	FR-CRC	stool	gut	0	CRC	M	59	27			179953044
CCIS80332425OR-31-0	FR-316	FAM.FR-316	EMBL	FR-CRC	saliva	oral	0	control	M	62	23			93710604
CCIS23164343ST-4-0	FR-316	FAM.FR-316	EMBL	FR-CRC	stool	gut	0	control	M	62	23			137425298
CCIS97613066OR-31-0	FR-400	FAM.FR-400	EMBL	FR-CRC	saliva	oral	0	control	M	67	21			119738762
CCIS09568613ST-4-0	FR-400	FAM.FR-400	EMBL	FR-CRC	stool	gut	0	control	M	67	21			151753748
CCIS13011915OR-31-0	FR-414	FAM.FR-414	EMBL	FR-CRC	saliva	oral	0	CRC	M	63	25			64798962
CCIS21278152ST-4-0	FR-414	FAM.FR-414	EMBL	FR-CRC	stool	gut	0	CRC	M	63	25			106367434
CCIS13903342OR-31-0	FR-430	FAM.FR-430	EMBL	FR-CRC	saliva	oral	0	CRC	M	80	29.4			51497606
CCIS34055159ST-4-0	FR-430	FAM.FR-430	EMBL	FR-CRC	stool	gut	0	CRC	M	80	29.4			93469084
CCIS41871920OR-20-0	FR-450	FAM.FR-450	EMBL	FR-CRC	saliva	oral	0	CRC	M	44	20			38883312
CCIS76845094ST-20-0	FR-450	FAM.FR-450	EMBL	FR-CRC	stool	gut	0	CRC	M	44	20			306864800
CCIS48386703OR-4-0	FR-459	FAM.FR-459	EMBL	FR-CRC	saliva	oral	0	CRC	M	63	29			27388694
CCIS98512455ST-4-0	FR-459	FAM.FR-459	EMBL	FR-CRC	stool	gut	0	CRC	M	63	29			92104876
CCIS25955412OR-31-0	FR-505	FAM.FR-505	EMBL	FR-CRC	saliva	oral	0	CRC	M	73	17			58569890
CCIS87252800ST-4-0	FR-505	FAM.FR-505	EMBL	FR-CRC	stool	gut	0	CRC	M	73	17			52030240
CCIS10297869OR-20-0	FR-506	FAM.FR-506	EMBL	FR-CRC	saliva	oral	0	CRC	M	60	26			29471066
CCIS22958137ST-20-0	FR-506	FAM.FR-506	EMBL	FR-CRC	stool	gut	0	CRC	M	60	26			196119098
CCIS97542740OR-4-0	FR-551	FAM.FR-551	EMBL	FR-CRC	saliva	oral	0	CRC	M	72	22			10372520
CCIS53043478ST-4-0	FR-551	FAM.FR-551	EMBL	FR-CRC	stool	gut	0	CRC	M	72	22			82936202
CCIS77453191OR-31-0	FR-552	FAM.FR-552	EMBL	FR-CRC	saliva	oral	0	CRC	F	55	25			123746770
CCIS98832363ST-4-0	FR-552	FAM.FR-552	EMBL	FR-CRC	stool	gut	0	CRC	F	55	25			139586244
CCIS53521324OR-31-0	FR-558	FAM.FR-558	EMBL	FR-CRC	saliva	oral	0	control	F	67	28			66392400
CCIS41692898ST-4-0	FR-558	FAM.FR-558	EMBL	FR-CRC	stool	gut	0	control	F	67	28			150092542
CCIS03609590OR-4-0	FR-654	FAM.FR-654	EMBL	FR-CRC	saliva	oral	0	CRC	M	51	30			10443344
CCIS12656533ST-4-0	FR-654	FAM.FR-654	EMBL	FR-CRC	stool	gut	0	CRC	M	51	30			91093840
CCIS80357356OR-31-0	FR-667	FAM.FR-667	EMBL	FR-CRC	saliva	oral	0	CRC	M	67	25			46484426
CCIS47284573ST-4-0	FR-667	FAM.FR-667	EMBL	FR-CRC	stool	gut	0	CRC	M	67	25			79490296
CCIS89284905OR-31-0	FR-682	FAM.FR-682	EMBL	FR-CRC	saliva	oral	0	control	M	65	30			60194446
CCIS93040568ST-20-0	FR-682	FAM.FR-682	EMBL	FR-CRC	stool	gut	0	control	M	65	30			27047072
CCIS20412074OR-31-0	FR-684	FAM.FR-684	EMBL	FR-CRC	saliva	oral	0	control	M	67	25			68069522
CCIS45793747ST-4-0	FR-684	FAM.FR-684	EMBL	FR-CRC	stool	gut	0	control	M	67	25			169611058
CCIS92729916OR-31-0	FR-696	FAM.FR-696	EMBL	FR-CRC	saliva	oral	0	control	M	52	24			77070460
CCIS95097901ST-4-0	FR-696	FAM.FR-696	EMBL	FR-CRC	stool	gut	0	control	M	52	24			103134332
CCIS16271858OR-31-0	FR-721	FAM.FR-721	EMBL	FR-CRC	saliva	oral	0	control	F	62	20			49191866
CCIS44093303ST-4-0	FR-721	FAM.FR-721	EMBL	FR-CRC	stool	gut	0	control	F	62	20			146687036
CCIS46397004OR-4-0	FR-722	FAM.FR-722	EMBL	FR-CRC	saliva	oral	0	CRC	F	45	28			6110312
CCIS84543192ST-4-0	FR-722	FAM.FR-722	EMBL	FR-CRC	stool	gut	0	CRC	F	45	28			70251530
CCIS98446172OR-20-0	FR-723	FAM.FR-723	EMBL	FR-CRC	saliva	oral	0	CRC	F	79	22			37486440
CCIS38765456ST-20-0	FR-723	FAM.FR-723	EMBL	FR-CRC	stool	gut	0	CRC	F	79	22			163365964
CCIS50801968OR-31-0	FR-728	FAM.FR-728	EMBL	FR-CRC	saliva	oral	0	control	F	64	30			67036244
CCIS78100604ST-4-0	FR-728	FAM.FR-728	EMBL	FR-CRC	stool	gut	0	control	F	64	30			156301080
CCIS24079203OR-31-0	FR-734	FAM.FR-734	EMBL	FR-CRC	saliva	oral	0	CRC	M	64	30			64228464
CCIS55230578ST-4-0	FR-734	FAM.FR-734	EMBL	FR-CRC	stool	gut	0	CRC	M	64	30			125376780
CCIS36368732OR-31-0	FR-768	FAM.FR-768	EMBL	FR-CRC	saliva	oral	0	CRC	F	69	30			72621114
CCIS78318719ST-4-0	FR-768	FAM.FR-768	EMBL	FR-CRC	stool	gut	0	CRC	F	69	30			118248818
CCIS69751857OR-31-0	FR-772	FAM.FR-772	EMBL	FR-CRC	saliva	oral	0	CRC	F	69	25			61277864
CCIS65479369ST-4-0	FR-772	FAM.FR-772	EMBL	FR-CRC	stool	gut	0	CRC	F	69	25			33301228
CCIS65519115OR-31-0	FR-780	FAM.FR-780	EMBL	FR-CRC	saliva	oral	0	CRC	M	68	23			58345240
CCIS62794166ST-4-0	FR-780	FAM.FR-780	EMBL	FR-CRC	stool	gut	0	CRC	M	68	23			78667618
CCIS84391851OR-31-0	FR-788	FAM.FR-788	EMBL	FR-CRC	saliva	oral	0	CRC	M	62	26			50393120
CCIS11015875ST-4-0	FR-788	FAM.FR-788	EMBL	FR-CRC	stool	gut	0	CRC	M	62	26			114857110
CCIS93602237OR-4-0	FR-820	FAM.FR-820	EMBL	FR-CRC	saliva	oral	0	small_adenoma	F	76	34			71849424
CCIS59903910ST-4-0	FR-820	FAM.FR-820	EMBL	FR-CRC	stool	gut	0	small_adenoma	F	76	34			112090624
CCIS96260456OR-31-0	FR-827	FAM.FR-827	EMBL	FR-CRC	saliva	oral	0	CRC	M	53	25			105644922
CCIS52370277ST-4-0	FR-827	FAM.FR-827	EMBL	FR-CRC	stool	gut	0	CRC	M	53	25			112257678
CCIS42171241OR-31-0	FR-828	FAM.FR-828	EMBL	FR-CRC	saliva	oral	0	CRC	M	67	28			84923180
CCIS02379307ST-4-0	FR-828	FAM.FR-828	EMBL	FR-CRC	stool	gut	0	CRC	M	67	28			21148088
CCIS48634038OR-31-0	FR-830	FAM.FR-830	EMBL	FR-CRC	saliva	oral	0	CRC	F	54	22			52826318
CCIS46467422ST-4-0	FR-830	FAM.FR-830	EMBL	FR-CRC	stool	gut	0	CRC	F	54	22			25318050
SAMN02333917	FijiCOMP.W1.9	FijiCOMP.Village_4	HMP_FijiCOMP	FijiCOMP	stool	gut	0	control	F				SAMN02333917	101025440
SAMN02333918	FijiCOMP.W2.7	FijiCOMP.Village_3	HMP_FijiCOMP	FijiCOMP	stool	gut	0	control	F				SAMN02333918	103445154
SAMN02333919	FijiCOMP.W2.9	FijiCOMP.Village_3	HMP_FijiCOMP	FijiCOMP	stool	gut	0	control	F				SAMN02333919	119048724
SAMN02333920	FijiCOMP.M1.61	FijiCOMP.Village_1	HMP_FijiCOMP	FijiCOMP	stool	gut	0	control	M				SAMN02333920	112684400
SAMN02333921	FijiCOMP.M1.64	FijiCOMP.Village_1	HMP_FijiCOMP	FijiCOMP	stool	gut	0	control	M				SAMN02333921	125041490
SAMN02333922	FijiCOMP.M2.38	FijiCOMP.Village_1	HMP_FijiCOMP	FijiCOMP	stool	gut	0	control	M				SAMN02333922	102663008
SAMN02333923	FijiCOMP.M2.44	FijiCOMP.Village_1	HMP_FijiCOMP	FijiCOMP	stool	gut	0	control	M				SAMN02333923	98933730
SAMN02333924	FijiCOMP.M2.45	FijiCOMP.Village_1	HMP_FijiCOMP	FijiCOMP	stool	gut	0	control	M				SAMN02333924	109619684
SAMN02333925	FijiCOMP.W1.13	FijiCOMP.Village_4	HMP_FijiCOMP	FijiCOMP	stool	gut	0	control	F				SAMN02333925	117718098
SAMN02333926	FijiCOMP.W2.44	FijiCOMP.Village_3	HMP_FijiCOMP	FijiCOMP	stool	gut	0	control	F				SAMN02333926	121180840
SAMN02333936	FijiCOMP.W2.4	FijiCOMP.Village_3	HMP_FijiCOMP	FijiCOMP	stool	gut	0	control	F				SAMN02333936	105006048
SAMN02333939	FijiCOMP.M1.20	FijiCOMP.Village_1	HMP_FijiCOMP	FijiCOMP	stool	gut	0	control	M				SAMN02333939	126332654
SAMN02333940	FijiCOMP.M1.52	FijiCOMP.Village_1	HMP_FijiCOMP	FijiCOMP	stool	gut	0	control	M				SAMN02333940	102739136
SAMN02333941	FijiCOMP.M2.57	FijiCOMP.Village_1	HMP_FijiCOMP	FijiCOMP	stool	gut	0	control	M				SAMN02333941	105579112
SAMN02333942	FijiCOMP.W1.39	FijiCOMP.Village_4	HMP_FijiCOMP	FijiCOMP	stool	gut	0	control	F				SAMN02333942	129014784
SAMN02333943	FijiCOMP.W2.34	FijiCOMP.Village_3	HMP_FijiCOMP	FijiCOMP	stool	gut	0	control	F				SAMN02333943	130401922
SAMN02333944	FijiCOMP.W2.47	FijiCOMP.Village_3	HMP_FijiCOMP	FijiCOMP	stool	gut	0	control	F				SAMN02333944	107846358
SAMN02333945	FijiCOMP.W2.49	FijiCOMP.Village_3	HMP_FijiCOMP	FijiCOMP	stool	gut	0	control	F				SAMN02333945	113712952
SAMN02333946	FijiCOMP.W2.61	FijiCOMP.Village_3	HMP_FijiCOMP	FijiCOMP	stool	gut	0	control	F				SAMN02333946	112633732
SAMN02333947	FijiCOMP.W2.68	FijiCOMP.Village_3	HMP_FijiCOMP	FijiCOMP	stool	gut	0	control	F				SAMN02333947	111099810
SAMN02333948	FijiCOMP.W3.20	FijiCOMP.Village_3	HMP_FijiCOMP	FijiCOMP	stool	gut	0	control	F				SAMN02333948	105571566
SAMN02333956	FijiCOMP.M1.6	FijiCOMP.Village_1	HMP_FijiCOMP	FijiCOMP	stool	gut	0	control	M				SAMN02333956	129403562
SAMN02333957	FijiCOMP.M1.7	FijiCOMP.Village_1	HMP_FijiCOMP	FijiCOMP	stool	gut	0	control	M				SAMN02333957	109097416
SAMN02333958	FijiCOMP.W1.3	FijiCOMP.Village_4	HMP_FijiCOMP	FijiCOMP	stool	gut	0	control	F				SAMN02333958	96327088
SAMN02333960	FijiCOMP.M2.40	FijiCOMP.Village_1	HMP_FijiCOMP	FijiCOMP	stool	gut	0	control	M				SAMN02333960	89120558
SAMN02333961	FijiCOMP.M2.41	FijiCOMP.Village_1	HMP_FijiCOMP	FijiCOMP	stool	gut	0	control	M				SAMN02333961	102496796
SAMN02333962	FijiCOMP.M2.56	FijiCOMP.Village_1	HMP_FijiCOMP	FijiCOMP	stool	gut	0	control	M				SAMN02333962	117711288
SAMN02333963	FijiCOMP.W1.27	FijiCOMP.Village_4	HMP_FijiCOMP	FijiCOMP	stool	gut	0	control	F				SAMN02333963	117470096
SAMN02333964	FijiCOMP.W1.53	FijiCOMP.Village_4	HMP_FijiCOMP	FijiCOMP	stool	gut	0	control	F				SAMN02333964	101580666
SAMN02333965	FijiCOMP.W2.19	FijiCOMP.Village_3	HMP_FijiCOMP	FijiCOMP	stool	gut	0	control	F				SAMN02333965	123565240
SAMN02333966	FijiCOMP.W2.23	FijiCOMP.Village_3	HMP_FijiCOMP	FijiCOMP	stool	gut	0	control	F				SAMN02333966	112063430
SAMN02333967	FijiCOMP.W2.35	FijiCOMP.Village_3	HMP_FijiCOMP	FijiCOMP	stool	gut	0	control	F				SAMN02333967	113194618
SAMN02333968	FijiCOMP.W2.40	FijiCOMP.Village_3	HMP_FijiCOMP	FijiCOMP	stool	gut	0	control	F				SAMN02333968	109287218
SAMN02333969	FijiCOMP.W3.19	FijiCOMP.Village_3	HMP_FijiCOMP	FijiCOMP	stool	gut	0	control	F				SAMN02333969	101832602
SAMN02333970	FijiCOMP.W3.22	FijiCOMP.Village_3	HMP_FijiCOMP	FijiCOMP	stool	gut	0	control	F				SAMN02333970	227969022
SAMN02333977	FijiCOMP.M2.5	FijiCOMP.Village_1	HMP_FijiCOMP	FijiCOMP	stool	gut	0	control	M				SAMN02333977	115705522
SAMN02333979	FijiCOMP.M1.48	FijiCOMP.Village_1	HMP_FijiCOMP	FijiCOMP	stool	gut	0	control	M				SAMN02333979	125397978
SAMN02333980	FijiCOMP.M2.31	FijiCOMP.Village_1	HMP_FijiCOMP	FijiCOMP	stool	gut	0	control	M				SAMN02333980	117397496
SAMN02333981	FijiCOMP.W1.37	FijiCOMP.Village_4	HMP_FijiCOMP	FijiCOMP	stool	gut	0	control	F				SAMN02333981	124381026
SAMN02333982	FijiCOMP.W1.42	FijiCOMP.Village_4	HMP_FijiCOMP	FijiCOMP	stool	gut	0	control	F				SAMN02333982	114861736
SAMN02333983	FijiCOMP.W2.13	FijiCOMP.Village_3	HMP_FijiCOMP	FijiCOMP	stool	gut	0	control	F				SAMN02333983	112027718
SAMN02333984	FijiCOMP.W2.17	FijiCOMP.Village_3	HMP_FijiCOMP	FijiCOMP	stool	gut	0	control	F				SAMN02333984	103894374
SAMN02333985	FijiCOMP.W2.48	FijiCOMP.Village_3	HMP_FijiCOMP	FijiCOMP	stool	gut	0	control	F				SAMN02333985	118251308
SAMN02333986	FijiCOMP.W2.59	FijiCOMP.Village_3	HMP_FijiCOMP	FijiCOMP	stool	gut	0	control	F				SAMN02333986	105987376
SAMN02333993	FijiCOMP.M1.5	FijiCOMP.Village_1	HMP_FijiCOMP	FijiCOMP	stool	gut	0	control	M				SAMN02333993	93594722
SAMN02333996	FijiCOMP.M1.10	FijiCOMP.Village_1	HMP_FijiCOMP	FijiCOMP	stool	gut	0	control	M				SAMN02333996	94943578
SAMN02333997	FijiCOMP.M1.44	FijiCOMP.Village_1	HMP_FijiCOMP	FijiCOMP	stool	gut	0	control	M				SAMN02333997	118634654
SAMN02333999	FijiCOMP.W1.33	FijiCOMP.Village_4	HMP_FijiCOMP	FijiCOMP	stool	gut	0	control	F				SAMN02333999	95058988
SAMN02334000	FijiCOMP.W1.41	FijiCOMP.Village_4	HMP_FijiCOMP	FijiCOMP	stool	gut	0	control	F				SAMN02334000	115236832
SAMN02334001	FijiCOMP.W2.36	FijiCOMP.Village_3	HMP_FijiCOMP	FijiCOMP	stool	gut	0	control	F				SAMN02334001	115641336
SAMN02334002	FijiCOMP.W2.41	FijiCOMP.Village_3	HMP_FijiCOMP	FijiCOMP	stool	gut	0	control	F				SAMN02334002	107343888
SAMN02334003	FijiCOMP.W2.45	FijiCOMP.Village_3	HMP_FijiCOMP	FijiCOMP	stool	gut	0	control	F				SAMN02334003	116922782
SAMN02334004	FijiCOMP.W2.54	FijiCOMP.Village_3	HMP_FijiCOMP	FijiCOMP	stool	gut	0	control	F				SAMN02334004	110196088
SAMN02334005	FijiCOMP.W2.63	FijiCOMP.Village_3	HMP_FijiCOMP	FijiCOMP	stool	gut	0	control	F				SAMN02334005	94462838
SAMN02334016	FijiCOMP.M1.4	FijiCOMP.Village_1	HMP_FijiCOMP	FijiCOMP	stool	gut	0	control	M				SAMN02334016	110353150
SAMN02334017	FijiCOMP.W1.1	FijiCOMP.Village_4	HMP_FijiCOMP	FijiCOMP	stool	gut	0	control	F				SAMN02334017	126854526
SAMN02334018	FijiCOMP.W1.6	FijiCOMP.Village_4	HMP_FijiCOMP	FijiCOMP	stool	gut	0	control	F				SAMN02334018	117721448
SAMN02334019	FijiCOMP.WL.2	FijiCOMP.Village_2	HMP_FijiCOMP	FijiCOMP	stool	gut	0	control	F				SAMN02334019	121152400
SAMN02334021	FijiCOMP.M1.16	FijiCOMP.Village_1	HMP_FijiCOMP	FijiCOMP	stool	gut	0	control	M				SAMN02334021	117602944
SAMN02334022	FijiCOMP.M1.22	FijiCOMP.Village_1	HMP_FijiCOMP	FijiCOMP	stool	gut	0	control	M				SAMN02334022	129036068
SAMN02334023	FijiCOMP.M1.24	FijiCOMP.Village_1	HMP_FijiCOMP	FijiCOMP	stool	gut	0	control	M				SAMN02334023	103971134
SAMN02334024	FijiCOMP.M1.25	FijiCOMP.Village_1	HMP_FijiCOMP	FijiCOMP	stool	gut	0	control	M				SAMN02334024	106240160
SAMN02334025	FijiCOMP.M1.57	FijiCOMP.Village_1	HMP_FijiCOMP	FijiCOMP	stool	gut	0	control	M				SAMN02334025	111854390
SAMN02334026	FijiCOMP.M1.62	FijiCOMP.Village_1	HMP_FijiCOMP	FijiCOMP	stool	gut	0	control	M				SAMN02334026	99828490
SAMN02334027	FijiCOMP.M2.37	FijiCOMP.Village_1	HMP_FijiCOMP	FijiCOMP	stool	gut	0	control	M				SAMN02334027	98433140
SAMN02334028	FijiCOMP.M2.48	FijiCOMP.Village_1	HMP_FijiCOMP	FijiCOMP	stool	gut	0	control	M				SAMN02334028	110004246
SAMN02334030	FijiCOMP.W1.36	FijiCOMP.Village_4	HMP_FijiCOMP	FijiCOMP	stool	gut	0	control	F				SAMN02334030	92325672
SAMN02334031	FijiCOMP.W2.42	FijiCOMP.Village_3	HMP_FijiCOMP	FijiCOMP	stool	gut	0	control	F				SAMN02334031	21379934
SAMN02334036	FijiCOMP.M1.1	FijiCOMP.Village_1	HMP_FijiCOMP	FijiCOMP	stool	gut	0	control	M				SAMN02334036	119183132
SAMN02334037	FijiCOMP.W1.4	FijiCOMP.Village_4	HMP_FijiCOMP	FijiCOMP	stool	gut	0	control	F				SAMN02334037	126069036
SAMN02334038	FijiCOMP.M1.26	FijiCOMP.Village_1	HMP_FijiCOMP	FijiCOMP	stool	gut	0	control	M				SAMN02334038	123493896
SAMN02334039	FijiCOMP.M1.65	FijiCOMP.Village_1	HMP_FijiCOMP	FijiCOMP	stool	gut	0	control	M				SAMN02334039	111586294
SAMN02334040	FijiCOMP.M2.49	FijiCOMP.Village_1	HMP_FijiCOMP	FijiCOMP	stool	gut	0	control	M				SAMN02334040	100995234
SAMN02334041	FijiCOMP.M2.50	FijiCOMP.Village_1	HMP_FijiCOMP	FijiCOMP	stool	gut	0	control	M				SAMN02334041	95098484
SAMN02334043	FijiCOMP.W2.67	FijiCOMP.Village_3	HMP_FijiCOMP	FijiCOMP	stool	gut	0	control	F				SAMN02334043	103683966
SAMN02334049	FijiCOMP.M1.8	FijiCOMP.Village_1	HMP_FijiCOMP	FijiCOMP	stool	gut	0	control	M				SAMN02334049	127862240
SAMN02334051	FijiCOMP.M1.38	FijiCOMP.Village_1	HMP_FijiCOMP	FijiCOMP	stool	gut	0	control	M				SAMN02334051	96359350
SAMN02334052	FijiCOMP.M1.42	FijiCOMP.Village_1	HMP_FijiCOMP	FijiCOMP	stool	gut	0	control	M				SAMN02334052	96102724
SAMN02334053	FijiCOMP.M1.63	FijiCOMP.Village_1	HMP_FijiCOMP	FijiCOMP	stool	gut	0	control	M				SAMN02334053	114069914
SAMN02334054	FijiCOMP.M2.46	FijiCOMP.Village_1	HMP_FijiCOMP	FijiCOMP	stool	gut	0	control	M				SAMN02334054	102307322
SAMN02334055	FijiCOMP.M2.51	FijiCOMP.Village_1	HMP_FijiCOMP	FijiCOMP	stool	gut	0	control	M				SAMN02334055	104539248
SAMN02334056	FijiCOMP.W1.54	FijiCOMP.Village_4	HMP_FijiCOMP	FijiCOMP	stool	gut	0	control	F				SAMN02334056	94953926
SAMN02334058	FijiCOMP.W2.25	FijiCOMP.Village_3	HMP_FijiCOMP	FijiCOMP	stool	gut	0	control	F				SAMN02334058	153657638
SAMN02334059	FijiCOMP.W2.33	FijiCOMP.Village_3	HMP_FijiCOMP	FijiCOMP	stool	gut	0	control	F				SAMN02334059	122575692
SAMN02334060	FijiCOMP.W2.52	FijiCOMP.Village_3	HMP_FijiCOMP	FijiCOMP	stool	gut	0	control	F				SAMN02334060	101735124
SAMN02334065	FijiCOMP.W1.5	FijiCOMP.Village_4	HMP_FijiCOMP	FijiCOMP	stool	gut	0	control	F				SAMN02334065	109763798
SAMN02334066	FijiCOMP.W2.6	FijiCOMP.Village_3	HMP_FijiCOMP	FijiCOMP	stool	gut	0	control	F				SAMN02334066	94610054
SAMN02334067	FijiCOMP.M1.15	FijiCOMP.Village_1	HMP_FijiCOMP	FijiCOMP	stool	gut	0	control	M				SAMN02334067	105557586
SAMN02334068	FijiCOMP.M1.29	FijiCOMP.Village_1	HMP_FijiCOMP	FijiCOMP	stool	gut	0	control	M				SAMN02334068	104032216
SAMN02334069	FijiCOMP.M1.37	FijiCOMP.Village_1	HMP_FijiCOMP	FijiCOMP	stool	gut	0	control	M				SAMN02334069	109981836
SAMN02334070	FijiCOMP.M2.11	FijiCOMP.Village_1	HMP_FijiCOMP	FijiCOMP	stool	gut	0	control	M				SAMN02334070	225844360
SAMN02334072	FijiCOMP.W1.11	FijiCOMP.Village_4	HMP_FijiCOMP	FijiCOMP	stool	gut	0	control	F				SAMN02334072	95986252
SAMN02334073	FijiCOMP.W1.26	FijiCOMP.Village_4	HMP_FijiCOMP	FijiCOMP	stool	gut	0	control	F				SAMN02334073	105550572
SAMN02334074	FijiCOMP.W2.46	FijiCOMP.Village_3	HMP_FijiCOMP	FijiCOMP	stool	gut	0	control	F				SAMN02334074	89190688
SAMN02334075	FijiCOMP.W2.53	FijiCOMP.Village_3	HMP_FijiCOMP	FijiCOMP	stool	gut	0	control	F				SAMN02334075	101462660
SAMN02334076	FijiCOMP.W3.16	FijiCOMP.Village_3	HMP_FijiCOMP	FijiCOMP	stool	gut	0	control	F				SAMN02334076	105974724
SAMN02334077	FijiCOMP.WL.10	FijiCOMP.Village_2	HMP_FijiCOMP	FijiCOMP	stool	gut	0	control	F				SAMN02334077	206522052
SAMN02334078	FijiCOMP.WL.14	FijiCOMP.Village_2	HMP_FijiCOMP	FijiCOMP	stool	gut	0	control	F				SAMN02334078	104109006
SAMN02334079	FijiCOMP.WL.20	FijiCOMP.Village_2	HMP_FijiCOMP	FijiCOMP	stool	gut	0	control	F				SAMN02334079	126844194
SAMN02334080	FijiCOMP.M2.3	FijiCOMP.Village_1	HMP_FijiCOMP	FijiCOMP	stool	gut	0	control	M				SAMN02334080	123231752
SAMN02334081	FijiCOMP.M1.36	FijiCOMP.Village_1	HMP_FijiCOMP	FijiCOMP	stool	gut	0	control	M				SAMN02334081	96975036
SAMN02334082	FijiCOMP.M2.36	FijiCOMP.Village_1	HMP_FijiCOMP	FijiCOMP	stool	gut	0	control	M				SAMN02334082	106678942
SAMN02334083	FijiCOMP.W1.38	FijiCOMP.Village_4	HMP_FijiCOMP	FijiCOMP	stool	gut	0	control	F				SAMN02334083	95320222
SAMN02334084	FijiCOMP.W2.21	FijiCOMP.Village_3	HMP_FijiCOMP	FijiCOMP	stool	gut	0	control	F				SAMN02334084	103077574
SAMN02334085	FijiCOMP.WL.10	FijiCOMP.Village_2	HMP_FijiCOMP	FijiCOMP	saliva	oral	0	control	F				SAMN02334085	63828780
SAMN02334086	FijiCOMP.WL.33	FijiCOMP.Village_2	HMP_FijiCOMP	FijiCOMP	stool	gut	0	control	F				SAMN02334086	106810606
SAMN02334087	FijiCOMP.WL.35	FijiCOMP.Village_2	HMP_FijiCOMP	FijiCOMP	stool	gut	0	control	F				SAMN02334087	101392562
SAMN02334088	FijiCOMP.M1.3	FijiCOMP.Village_1	HMP_FijiCOMP	FijiCOMP	stool	gut	0	control	M				SAMN02334088	102012540
SAMN02334089	FijiCOMP.W2.5	FijiCOMP.Village_3	HMP_FijiCOMP	FijiCOMP	stool	gut	0	control	F				SAMN02334089	109246810
SAMN02334090	FijiCOMP.WL.7	FijiCOMP.Village_2	HMP_FijiCOMP	FijiCOMP	stool	gut	0	control	F				SAMN02334090	93133396
SAMN02334091	FijiCOMP.M1.35	FijiCOMP.Village_1	HMP_FijiCOMP	FijiCOMP	stool	gut	0	control	M				SAMN02334091	109809488
SAMN02334092	FijiCOMP.W1.15	FijiCOMP.Village_4	HMP_FijiCOMP	FijiCOMP	stool	gut	0	control	F				SAMN02334092	85532774
SAMN02334093	FijiCOMP.W1.22	FijiCOMP.Village_4	HMP_FijiCOMP	FijiCOMP	stool	gut	0	control	F				SAMN02334093	110879988
SAMN02334094	FijiCOMP.W1.40	FijiCOMP.Village_4	HMP_FijiCOMP	FijiCOMP	stool	gut	0	control	F				SAMN02334094	101318482
SAMN02334095	FijiCOMP.W2.43	FijiCOMP.Village_3	HMP_FijiCOMP	FijiCOMP	stool	gut	0	control	F				SAMN02334095	104579714
SAMN02334096	FijiCOMP.WL.12	FijiCOMP.Village_2	HMP_FijiCOMP	FijiCOMP	stool	gut	0	control	F				SAMN02334096	101988484
SAMN02334097	FijiCOMP.WL.32	FijiCOMP.Village_2	HMP_FijiCOMP	FijiCOMP	stool	gut	0	control	F				SAMN02334097	94391892
SAMN02334098	FijiCOMP.WL.34	FijiCOMP.Village_2	HMP_FijiCOMP	FijiCOMP	stool	gut	0	control	F				SAMN02334098	94586504
SAMN02334099	FijiCOMP.WL.1	FijiCOMP.Village_2	HMP_FijiCOMP	FijiCOMP	stool	gut	0	control	F				SAMN02334099	95162520
SAMN02334100	FijiCOMP.WL.8	FijiCOMP.Village_2	HMP_FijiCOMP	FijiCOMP	saliva	oral	0	control	F				SAMN02334100	38735244
SAMN02334101	FijiCOMP.M2.33	FijiCOMP.Village_1	HMP_FijiCOMP	FijiCOMP	stool	gut	0	control	M				SAMN02334101	95701058
SAMN02334102	FijiCOMP.W1.31	FijiCOMP.Village_4	HMP_FijiCOMP	FijiCOMP	stool	gut	0	control	F				SAMN02334102	111603172
SAMN02334103	FijiCOMP.W1.44	FijiCOMP.Village_4	HMP_FijiCOMP	FijiCOMP	stool	gut	0	control	F				SAMN02334103	117253970
SAMN02334104	FijiCOMP.WL.39	FijiCOMP.Village_2	HMP_FijiCOMP	FijiCOMP	stool	gut	0	control	F				SAMN02334104	73230740
SAMN02334105	FijiCOMP.WL.45	FijiCOMP.Village_2	HMP_FijiCOMP	FijiCOMP	stool	gut	0	control	F				SAMN02334105	120324650
SAMN02334106	FijiCOMP.W1.8	FijiCOMP.Village_4	HMP_FijiCOMP	FijiCOMP	stool	gut	0	control	F				SAMN02334106	123815636
SAMN02334108	FijiCOMP.M2.52	FijiCOMP.Village_1	HMP_FijiCOMP	FijiCOMP	stool	gut	0	control	M				SAMN02334108	97293300
SAMN02334109	FijiCOMP.M2.58	FijiCOMP.Village_1	HMP_FijiCOMP	FijiCOMP	stool	gut	0	control	M				SAMN02334109	112624382
SAMN02334110	FijiCOMP.W2.26	FijiCOMP.Village_3	HMP_FijiCOMP	FijiCOMP	stool	gut	0	control	F				SAMN02334110	108923666
SAMN02334111	FijiCOMP.W2.39	FijiCOMP.Village_3	HMP_FijiCOMP	FijiCOMP	stool	gut	0	control	F				SAMN02334111	90574556
SAMN02334112	FijiCOMP.W3.18	FijiCOMP.Village_3	HMP_FijiCOMP	FijiCOMP	stool	gut	0	control	F				SAMN02334112	94676214
SAMN02334113	FijiCOMP.W3.23	FijiCOMP.Village_3	HMP_FijiCOMP	FijiCOMP	stool	gut	0	control	F				SAMN02334113	99291686
SAMN02334114	FijiCOMP.WL.25	FijiCOMP.Village_2	HMP_FijiCOMP	FijiCOMP	stool	gut	0	control	F				SAMN02334114	109699246
SAMN02334116	FijiCOMP.WL.30	FijiCOMP.Village_2	HMP_FijiCOMP	FijiCOMP	stool	gut	0	control	F				SAMN02334116	112877160
SAMN02334117	FijiCOMP.WL.36	FijiCOMP.Village_2	HMP_FijiCOMP	FijiCOMP	stool	gut	0	control	F				SAMN02334117	108099978
SAMN02334118	FijiCOMP.WL.8	FijiCOMP.Village_2	HMP_FijiCOMP	FijiCOMP	stool	gut	0	control	F				SAMN02334118	214699066
SAMN02334119	FijiCOMP.M2.32	FijiCOMP.Village_1	HMP_FijiCOMP	FijiCOMP	stool	gut	0	control	M				SAMN02334119	96312620
SAMN02334120	FijiCOMP.W1.14	FijiCOMP.Village_4	HMP_FijiCOMP	FijiCOMP	stool	gut	0	control	F				SAMN02334120	100262724
SAMN02334121	FijiCOMP.W1.20	FijiCOMP.Village_4	HMP_FijiCOMP	FijiCOMP	stool	gut	0	control	F				SAMN02334121	106920886
SAMN02334122	FijiCOMP.W1.21	FijiCOMP.Village_4	HMP_FijiCOMP	FijiCOMP	stool	gut	0	control	F				SAMN02334122	114445492
SAMN02334123	FijiCOMP.W1.55	FijiCOMP.Village_4	HMP_FijiCOMP	FijiCOMP	stool	gut	0	control	F				SAMN02334123	104661748
SAMN02334124	FijiCOMP.W2.11	FijiCOMP.Village_3	HMP_FijiCOMP	FijiCOMP	stool	gut	0	control	F				SAMN02334124	114138764
SAMN02334125	FijiCOMP.WL.13	FijiCOMP.Village_2	HMP_FijiCOMP	FijiCOMP	stool	gut	0	control	F				SAMN02334125	79826324
SAMN02334126	FijiCOMP.W2.8	FijiCOMP.Village_3	HMP_FijiCOMP	FijiCOMP	stool	gut	0	control	F				SAMN02334126	93332264
SAMN02334127	FijiCOMP.WL.3	FijiCOMP.Village_2	HMP_FijiCOMP	FijiCOMP	stool	gut	0	control	F				SAMN02334127	97377820
SAMN02334128	FijiCOMP.WL.5	FijiCOMP.Village_2	HMP_FijiCOMP	FijiCOMP	stool	gut	0	control	F				SAMN02334128	106876000
SAMN02334129	FijiCOMP.WL.9	FijiCOMP.Village_2	HMP_FijiCOMP	FijiCOMP	saliva	oral	0	control	F				SAMN02334129	27523038
SAMN02334130	FijiCOMP.WL.9	FijiCOMP.Village_2	HMP_FijiCOMP	FijiCOMP	stool	gut	0	control	F				SAMN02334130	199769786
SAMN02334131	FijiCOMP.M2.11	FijiCOMP.Village_1	HMP_FijiCOMP	FijiCOMP	saliva	oral	0	control	M				SAMN02334131	27799658
SAMN02334132	FijiCOMP.M2.39	FijiCOMP.Village_1	HMP_FijiCOMP	FijiCOMP	stool	gut	0	control	M				SAMN02334132	90651698
SAMN02334133	FijiCOMP.W1.18	FijiCOMP.Village_4	HMP_FijiCOMP	FijiCOMP	stool	gut	0	control	F				SAMN02334133	101087874
SAMN02334134	FijiCOMP.W1.51	FijiCOMP.Village_4	HMP_FijiCOMP	FijiCOMP	stool	gut	0	control	F				SAMN02334134	94065812
SAMN02334135	FijiCOMP.W2.65	FijiCOMP.Village_3	HMP_FijiCOMP	FijiCOMP	stool	gut	0	control	F				SAMN02334135	86957080
SAMN02334136	FijiCOMP.W2.69	FijiCOMP.Village_3	HMP_FijiCOMP	FijiCOMP	stool	gut	0	control	F				SAMN02334136	103619212
SAMN02334137	FijiCOMP.W3.17	FijiCOMP.Village_3	HMP_FijiCOMP	FijiCOMP	stool	gut	0	control	F				SAMN02334137	105252094
SAMN02334138	FijiCOMP.WL.11	FijiCOMP.Village_2	HMP_FijiCOMP	FijiCOMP	stool	gut	0	control	F				SAMN02334138	87053662
SAMN02334139	FijiCOMP.WL.17	FijiCOMP.Village_2	HMP_FijiCOMP	FijiCOMP	stool	gut	0	control	F				SAMN02334139	109474990
SAMN02334140	FijiCOMP.WL.37	FijiCOMP.Village_2	HMP_FijiCOMP	FijiCOMP	stool	gut	0	control	F				SAMN02334140	78914112
SAMN02334141	FijiCOMP.WL.44	FijiCOMP.Village_2	HMP_FijiCOMP	FijiCOMP	saliva	oral	0	control	F				SAMN02334141	86930148
SAMN02334142	FijiCOMP.WL.44	FijiCOMP.Village_2	HMP_FijiCOMP	FijiCOMP	stool	gut	0	control	F				SAMN02334142	210364766
SAMN02334143	FijiCOMP.W1.2	FijiCOMP.Village_4	HMP_FijiCOMP	FijiCOMP	stool	gut	0	control	F				SAMN02334143	97977156
SAMN02334144	FijiCOMP.W3.1	FijiCOMP.Village_3	HMP_FijiCOMP	FijiCOMP	stool	gut	0	control	F				SAMN02334144	100495576
SAMN02334145	FijiCOMP.M1.23	FijiCOMP.Village_1	HMP_FijiCOMP	FijiCOMP	stool	gut	0	control	M				SAMN02334145	98475674
SAMN02334146	FijiCOMP.M1.59	FijiCOMP.Village_1	HMP_FijiCOMP	FijiCOMP	stool	gut	0	control	M				SAMN02334146	113245350
SAMN02334147	FijiCOMP.M2.60	FijiCOMP.Village_1	HMP_FijiCOMP	FijiCOMP	stool	gut	0	control	M				SAMN02334147	96562826
SAMN02334148	FijiCOMP.W1.34	FijiCOMP.Village_4	HMP_FijiCOMP	FijiCOMP	stool	gut	0	control	F				SAMN02334148	93364206
SAMN02334149	FijiCOMP.W2.56	FijiCOMP.Village_3	HMP_FijiCOMP	FijiCOMP	stool	gut	0	control	F				SAMN02334149	127161440
SAMN02334150	FijiCOMP.WL.15	FijiCOMP.Village_2	HMP_FijiCOMP	FijiCOMP	stool	gut	0	control	F				SAMN02334150	99984748
SAMN02334151	FijiCOMP.WL.26	FijiCOMP.Village_2	HMP_FijiCOMP	FijiCOMP	stool	gut	0	control	F				SAMN02334151	108691856
SAMN02334152	FijiCOMP.WL.28	FijiCOMP.Village_2	HMP_FijiCOMP	FijiCOMP	stool	gut	0	control	F				SAMN02334152	82277050
SAMN02334153	FijiCOMP.WL.43	FijiCOMP.Village_2	HMP_FijiCOMP	FijiCOMP	stool	gut	0	control	F				SAMN02334153	97534370
SAMN02334155	FijiCOMP.W1.4	FijiCOMP.Village_4	HMP_FijiCOMP	FijiCOMP	saliva	oral	0	control	F				SAMN02334155	8892880
SAMN02334156	FijiCOMP.W1.26	FijiCOMP.Village_4	HMP_FijiCOMP	FijiCOMP	saliva	oral	0	control	F				SAMN02334156	7319648
SAMN02334157	FijiCOMP.W1.37	FijiCOMP.Village_4	HMP_FijiCOMP	FijiCOMP	saliva	oral	0	control	F				SAMN02334157	8317550
SAMN02334158	FijiCOMP.W2.21	FijiCOMP.Village_3	HMP_FijiCOMP	FijiCOMP	saliva	oral	0	control	F				SAMN02334158	10247394
SAMN02334159	FijiCOMP.W2.25	FijiCOMP.Village_3	HMP_FijiCOMP	FijiCOMP	saliva	oral	0	control	F				SAMN02334159	7733974
SAMN02334165	FijiCOMP.W1.3	FijiCOMP.Village_4	HMP_FijiCOMP	FijiCOMP	saliva	oral	0	control	F				SAMN02334165	8021724
SAMN02334166	FijiCOMP.W1.9	FijiCOMP.Village_4	HMP_FijiCOMP	FijiCOMP	saliva	oral	0	control	F				SAMN02334166	15416686
SAMN02334167	FijiCOMP.WL.1	FijiCOMP.Village_2	HMP_FijiCOMP	FijiCOMP	saliva	oral	0	control	F				SAMN02334167	14204022
SAMN02334168	FijiCOMP.M2.41	FijiCOMP.Village_1	HMP_FijiCOMP	FijiCOMP	saliva	oral	0	control	M				SAMN02334168	33648722
SAMN02334170	FijiCOMP.M2.45	FijiCOMP.Village_1	HMP_FijiCOMP	FijiCOMP	saliva	oral	0	control	M				SAMN02334170	9989132
SAMN02334171	FijiCOMP.M2.50	FijiCOMP.Village_1	HMP_FijiCOMP	FijiCOMP	saliva	oral	0	control	M				SAMN02334171	9113168
SAMN02334172	FijiCOMP.M2.58	FijiCOMP.Village_1	HMP_FijiCOMP	FijiCOMP	saliva	oral	0	control	M				SAMN02334172	11124030
SAMN02334173	FijiCOMP.M2.60	FijiCOMP.Village_1	HMP_FijiCOMP	FijiCOMP	saliva	oral	0	control	M				SAMN02334173	7930732
SAMN02334175	FijiCOMP.W1.42	FijiCOMP.Village_4	HMP_FijiCOMP	FijiCOMP	saliva	oral	0	control	F				SAMN02334175	14462610
SAMN02334177	FijiCOMP.W2.49	FijiCOMP.Village_3	HMP_FijiCOMP	FijiCOMP	saliva	oral	0	control	F				SAMN02334177	8472120
SAMN02334187	FijiCOMP.W1.8	FijiCOMP.Village_4	HMP_FijiCOMP	FijiCOMP	saliva	oral	0	control	F				SAMN02334187	7971976
SAMN02334188	FijiCOMP.M2.40	FijiCOMP.Village_1	HMP_FijiCOMP	FijiCOMP	saliva	oral	0	control	M				SAMN02334188	13007086
SAMN02334191	FijiCOMP.W1.40	FijiCOMP.Village_4	HMP_FijiCOMP	FijiCOMP	saliva	oral	0	control	F				SAMN02334191	21842204
SAMN02334194	FijiCOMP.W2.23	FijiCOMP.Village_3	HMP_FijiCOMP	FijiCOMP	saliva	oral	0	control	F				SAMN02334194	27753654
SAMN02334196	FijiCOMP.W3.22	FijiCOMP.Village_3	HMP_FijiCOMP	FijiCOMP	saliva	oral	0	control	F				SAMN02334196	42270612
SAMN02334197	FijiCOMP.WL.34	FijiCOMP.Village_2	HMP_FijiCOMP	FijiCOMP	saliva	oral	0	control	F				SAMN02334197	16710106
SAMN02334208	FijiCOMP.W1.1	FijiCOMP.Village_4	HMP_FijiCOMP	FijiCOMP	saliva	oral	0	control	F				SAMN02334208	7692756
SAMN02334209	FijiCOMP.W1.6	FijiCOMP.Village_4	HMP_FijiCOMP	FijiCOMP	saliva	oral	0	control	F				SAMN02334209	10321592
SAMN02334210	FijiCOMP.W1.39	FijiCOMP.Village_4	HMP_FijiCOMP	FijiCOMP	saliva	oral	0	control	F				SAMN02334210	10332940
SAMN02334211	FijiCOMP.W1.44	FijiCOMP.Village_4	HMP_FijiCOMP	FijiCOMP	saliva	oral	0	control	F				SAMN02334211	13408508
SAMN02334215	FijiCOMP.W2.43	FijiCOMP.Village_3	HMP_FijiCOMP	FijiCOMP	saliva	oral	0	control	F				SAMN02334215	27757524
SAMN02334218	FijiCOMP.WL.11	FijiCOMP.Village_2	HMP_FijiCOMP	FijiCOMP	saliva	oral	0	control	F				SAMN02334218	10427546
SAMN02334232	FijiCOMP.W1.5	FijiCOMP.Village_4	HMP_FijiCOMP	FijiCOMP	saliva	oral	0	control	F				SAMN02334232	13797224
SAMN02334233	FijiCOMP.W3.1	FijiCOMP.Village_3	HMP_FijiCOMP	FijiCOMP	saliva	oral	0	control	F				SAMN02334233	9661914
SAMN02334234	FijiCOMP.M2.51	FijiCOMP.Village_1	HMP_FijiCOMP	FijiCOMP	saliva	oral	0	control	M				SAMN02334234	10088738
SAMN02334235	FijiCOMP.M2.57	FijiCOMP.Village_1	HMP_FijiCOMP	FijiCOMP	saliva	oral	0	control	M				SAMN02334235	10070440
SAMN02334237	FijiCOMP.W1.18	FijiCOMP.Village_4	HMP_FijiCOMP	FijiCOMP	saliva	oral	0	control	F				SAMN02334237	24540702
SAMN02334238	FijiCOMP.W1.38	FijiCOMP.Village_4	HMP_FijiCOMP	FijiCOMP	saliva	oral	0	control	F				SAMN02334238	8636112
SAMN02334241	FijiCOMP.W2.19	FijiCOMP.Village_3	HMP_FijiCOMP	FijiCOMP	saliva	oral	0	control	F				SAMN02334241	9540992
SAMN02334242	FijiCOMP.W2.65	FijiCOMP.Village_3	HMP_FijiCOMP	FijiCOMP	saliva	oral	0	control	F				SAMN02334242	31969664
SAMN02334248	FijiCOMP.W2.4	FijiCOMP.Village_3	HMP_FijiCOMP	FijiCOMP	saliva	oral	0	control	F				SAMN02334248	19589366
SAMN02334249	FijiCOMP.M2.44	FijiCOMP.Village_1	HMP_FijiCOMP	FijiCOMP	saliva	oral	0	control	M				SAMN02334249	6550094
SAMN02334250	FijiCOMP.M2.48	FijiCOMP.Village_1	HMP_FijiCOMP	FijiCOMP	saliva	oral	0	control	M				SAMN02334250	19262872
SAMN02334254	FijiCOMP.W1.22	FijiCOMP.Village_4	HMP_FijiCOMP	FijiCOMP	saliva	oral	0	control	F				SAMN02334254	16348844
SAMN02334258	FijiCOMP.W2.48	FijiCOMP.Village_3	HMP_FijiCOMP	FijiCOMP	saliva	oral	0	control	F				SAMN02334258	10670146
SAMN02334259	FijiCOMP.W3.19	FijiCOMP.Village_3	HMP_FijiCOMP	FijiCOMP	saliva	oral	0	control	F				SAMN02334259	11266538
SAMN02334261	FijiCOMP.M2.39	FijiCOMP.Village_1	HMP_FijiCOMP	FijiCOMP	saliva	oral	0	control	M				SAMN02334261	9308214
SAMN02334263	FijiCOMP.M2.52	FijiCOMP.Village_1	HMP_FijiCOMP	FijiCOMP	saliva	oral	0	control	M				SAMN02334263	9960446
SAMN02334266	FijiCOMP.M2.56	FijiCOMP.Village_1	HMP_FijiCOMP	FijiCOMP	saliva	oral	0	control	M				SAMN02334266	9426254
SAMN02334271	FijiCOMP.W3.20	FijiCOMP.Village_3	HMP_FijiCOMP	FijiCOMP	saliva	oral	0	control	F				SAMN02334271	15311108
SAMN02334276	FijiCOMP.W1.2	FijiCOMP.Village_4	HMP_FijiCOMP	FijiCOMP	saliva	oral	0	control	F				SAMN02334276	15548038
SAMN02334277	FijiCOMP.M2.36	FijiCOMP.Village_1	HMP_FijiCOMP	FijiCOMP	saliva	oral	0	control	M				SAMN02334277	18084186
SAMN02334278	FijiCOMP.M2.37	FijiCOMP.Village_1	HMP_FijiCOMP	FijiCOMP	saliva	oral	0	control	M				SAMN02334278	16928548
SAMN02334279	FijiCOMP.M2.38	FijiCOMP.Village_1	HMP_FijiCOMP	FijiCOMP	saliva	oral	0	control	M				SAMN02334279	7753340
SAMN02334280	FijiCOMP.M2.49	FijiCOMP.Village_1	HMP_FijiCOMP	FijiCOMP	saliva	oral	0	control	M				SAMN02334280	13102184
SAMN02334282	FijiCOMP.W1.11	FijiCOMP.Village_4	HMP_FijiCOMP	FijiCOMP	saliva	oral	0	control	F				SAMN02334282	15546248
SAMN02334283	FijiCOMP.W1.20	FijiCOMP.Village_4	HMP_FijiCOMP	FijiCOMP	saliva	oral	0	control	F				SAMN02334283	9742314
SAMN02334286	FijiCOMP.W2.42	FijiCOMP.Village_3	HMP_FijiCOMP	FijiCOMP	saliva	oral	0	control	F				SAMN02334286	15764338
SAMN02334296	FijiCOMP.M1.15	FijiCOMP.Village_1	HMP_FijiCOMP	FijiCOMP	saliva	oral	0	control	M				SAMN02334296	5407490
SAMN02334298	FijiCOMP.M1.52	FijiCOMP.Village_1	HMP_FijiCOMP	FijiCOMP	saliva	oral	0	control	M				SAMN02334298	24019052
SAMN02334300	FijiCOMP.M1.64	FijiCOMP.Village_1	HMP_FijiCOMP	FijiCOMP	saliva	oral	0	control	M				SAMN02334300	5752582
SAMN02334305	FijiCOMP.M2.32	FijiCOMP.Village_1	HMP_FijiCOMP	FijiCOMP	saliva	oral	0	control	M				SAMN02334305	6728466
SAMN02334308	FijiCOMP.W2.33	FijiCOMP.Village_3	HMP_FijiCOMP	FijiCOMP	saliva	oral	0	control	F				SAMN02334308	11496224
SAMN02334309	FijiCOMP.W2.63	FijiCOMP.Village_3	HMP_FijiCOMP	FijiCOMP	saliva	oral	0	control	F				SAMN02334309	13834738
SAMN02334310	FijiCOMP.W2.68	FijiCOMP.Village_3	HMP_FijiCOMP	FijiCOMP	saliva	oral	0	control	F				SAMN02334310	41361334
SAMN02334313	FijiCOMP.WL.26	FijiCOMP.Village_2	HMP_FijiCOMP	FijiCOMP	saliva	oral	0	control	F				SAMN02334313	8636442
SAMN02334315	FijiCOMP.WL.32	FijiCOMP.Village_2	HMP_FijiCOMP	FijiCOMP	saliva	oral	0	control	F				SAMN02334315	14594684
SAMN02334321	FijiCOMP.M1.57	FijiCOMP.Village_1	HMP_FijiCOMP	FijiCOMP	saliva	oral	0	control	M				SAMN02334321	3443644
SAMN02334323	FijiCOMP.W2.40	FijiCOMP.Village_3	HMP_FijiCOMP	FijiCOMP	saliva	oral	0	control	F				SAMN02334323	8110066
SAMN02334324	FijiCOMP.W2.47	FijiCOMP.Village_3	HMP_FijiCOMP	FijiCOMP	saliva	oral	0	control	F				SAMN02334324	8664208
SAMN02334325	FijiCOMP.W3.16	FijiCOMP.Village_3	HMP_FijiCOMP	FijiCOMP	saliva	oral	0	control	F				SAMN02334325	22107952
SAMN02334327	FijiCOMP.WL.33	FijiCOMP.Village_2	HMP_FijiCOMP	FijiCOMP	saliva	oral	0	control	F				SAMN02334327	17567286
SAMN02334328	FijiCOMP.WL.37	FijiCOMP.Village_2	HMP_FijiCOMP	FijiCOMP	saliva	oral	0	control	F				SAMN02334328	14105060
SAMN02334329	FijiCOMP.WL.39	FijiCOMP.Village_2	HMP_FijiCOMP	FijiCOMP	saliva	oral	0	control	F				SAMN02334329	11131812
SAMN02334330	FijiCOMP.WL.43	FijiCOMP.Village_2	HMP_FijiCOMP	FijiCOMP	saliva	oral	0	control	F				SAMN02334330	16685182
SAMN02334331	FijiCOMP.M2.5	FijiCOMP.Village_1	HMP_FijiCOMP	FijiCOMP	saliva	oral	0	control	M				SAMN02334331	5614610
SAMN02334333	FijiCOMP.M1.25	FijiCOMP.Village_1	HMP_FijiCOMP	FijiCOMP	saliva	oral	0	control	M				SAMN02334333	4804406
SAMN02334335	FijiCOMP.M1.42	FijiCOMP.Village_1	HMP_FijiCOMP	FijiCOMP	saliva	oral	0	control	M				SAMN02334335	7423984
SAMN02334340	FijiCOMP.M1.62	FijiCOMP.Village_1	HMP_FijiCOMP	FijiCOMP	saliva	oral	0	control	M				SAMN02334340	5302790
SAMN02334342	FijiCOMP.W2.34	FijiCOMP.Village_3	HMP_FijiCOMP	FijiCOMP	saliva	oral	0	control	F				SAMN02334342	14642472
SAMN02334343	FijiCOMP.WL.17	FijiCOMP.Village_2	HMP_FijiCOMP	FijiCOMP	saliva	oral	0	control	F				SAMN02334343	11039430
SAMN02334345	FijiCOMP.WL.35	FijiCOMP.Village_2	HMP_FijiCOMP	FijiCOMP	saliva	oral	0	control	F				SAMN02334345	8512166
SAMN02334346	FijiCOMP.M1.1	FijiCOMP.Village_1	HMP_FijiCOMP	FijiCOMP	saliva	oral	0	control	M				SAMN02334346	4842740
SAMN02334347	FijiCOMP.M1.3	FijiCOMP.Village_1	HMP_FijiCOMP	FijiCOMP	saliva	oral	0	control	M				SAMN02334347	9244844
SAMN02334348	FijiCOMP.M1.5	FijiCOMP.Village_1	HMP_FijiCOMP	FijiCOMP	saliva	oral	0	control	M				SAMN02334348	96114026
SAMN02334349	FijiCOMP.M1.10	FijiCOMP.Village_1	HMP_FijiCOMP	FijiCOMP	saliva	oral	0	control	M				SAMN02334349	6906710
SAMN02334354	FijiCOMP.M1.59	FijiCOMP.Village_1	HMP_FijiCOMP	FijiCOMP	saliva	oral	0	control	M				SAMN02334354	6433520
SAMN02334355	FijiCOMP.M1.65	FijiCOMP.Village_1	HMP_FijiCOMP	FijiCOMP	saliva	oral	0	control	M				SAMN02334355	13142380
SAMN02334357	FijiCOMP.M2.31	FijiCOMP.Village_1	HMP_FijiCOMP	FijiCOMP	saliva	oral	0	control	M				SAMN02334357	94902688
SAMN02334358	FijiCOMP.W1.53	FijiCOMP.Village_4	HMP_FijiCOMP	FijiCOMP	saliva	oral	0	control	F				SAMN02334358	8237292
SAMN02334359	FijiCOMP.W2.35	FijiCOMP.Village_3	HMP_FijiCOMP	FijiCOMP	saliva	oral	0	control	F				SAMN02334359	6883012
SAMN02334360	FijiCOMP.W2.44	FijiCOMP.Village_3	HMP_FijiCOMP	FijiCOMP	saliva	oral	0	control	F				SAMN02334360	10302344
SAMN02334361	FijiCOMP.W2.56	FijiCOMP.Village_3	HMP_FijiCOMP	FijiCOMP	saliva	oral	0	control	F				SAMN02334361	16599492
SAMN02334362	FijiCOMP.W2.67	FijiCOMP.Village_3	HMP_FijiCOMP	FijiCOMP	saliva	oral	0	control	F				SAMN02334362	6902812
SAMN02334366	FijiCOMP.WL.5	FijiCOMP.Village_2	HMP_FijiCOMP	FijiCOMP	saliva	oral	0	control	F				SAMN02334366	18581450
SAMN02334369	FijiCOMP.M1.24	FijiCOMP.Village_1	HMP_FijiCOMP	FijiCOMP	saliva	oral	0	control	M				SAMN02334369	7756614
SAMN02334370	FijiCOMP.M1.26	FijiCOMP.Village_1	HMP_FijiCOMP	FijiCOMP	saliva	oral	0	control	M				SAMN02334370	5124204
SAMN02334371	FijiCOMP.M1.29	FijiCOMP.Village_1	HMP_FijiCOMP	FijiCOMP	saliva	oral	0	control	M				SAMN02334371	8071978
SAMN02334378	FijiCOMP.M2.46	FijiCOMP.Village_1	HMP_FijiCOMP	FijiCOMP	saliva	oral	0	control	M				SAMN02334378	8287016
SAMN02334379	FijiCOMP.W1.15	FijiCOMP.Village_4	HMP_FijiCOMP	FijiCOMP	saliva	oral	0	control	F				SAMN02334379	5637710
SAMN02334380	FijiCOMP.W2.54	FijiCOMP.Village_3	HMP_FijiCOMP	FijiCOMP	saliva	oral	0	control	F				SAMN02334380	8184496
SAMN02334381	FijiCOMP.W2.59	FijiCOMP.Village_3	HMP_FijiCOMP	FijiCOMP	saliva	oral	0	control	F				SAMN02334381	10979808
SAMN02334382	FijiCOMP.W2.61	FijiCOMP.Village_3	HMP_FijiCOMP	FijiCOMP	saliva	oral	0	control	F				SAMN02334382	22478132
SAMN02334383	FijiCOMP.W2.69	FijiCOMP.Village_3	HMP_FijiCOMP	FijiCOMP	saliva	oral	0	control	F				SAMN02334383	5471644
SAMN02334385	FijiCOMP.WL.13	FijiCOMP.Village_2	HMP_FijiCOMP	FijiCOMP	saliva	oral	0	control	F				SAMN02334385	9252510
SAMN02334386	FijiCOMP.WL.20	FijiCOMP.Village_2	HMP_FijiCOMP	FijiCOMP	saliva	oral	0	control	F				SAMN02334386	6591814
SAMN02334388	FijiCOMP.WL.45	FijiCOMP.Village_2	HMP_FijiCOMP	FijiCOMP	saliva	oral	0	control	F				SAMN02334388	7985900
SAMN02334389	FijiCOMP.M1.4	FijiCOMP.Village_1	HMP_FijiCOMP	FijiCOMP	saliva	oral	0	control	M				SAMN02334389	6104820
SAMN02334390	FijiCOMP.M1.7	FijiCOMP.Village_1	HMP_FijiCOMP	FijiCOMP	saliva	oral	0	control	M				SAMN02334390	8389498
SAMN02334391	FijiCOMP.M1.8	FijiCOMP.Village_1	HMP_FijiCOMP	FijiCOMP	saliva	oral	0	control	M				SAMN02334391	5289454
SAMN02334392	FijiCOMP.M1.16	FijiCOMP.Village_1	HMP_FijiCOMP	FijiCOMP	saliva	oral	0	control	M				SAMN02334392	5848902
SAMN02334393	FijiCOMP.M1.20	FijiCOMP.Village_1	HMP_FijiCOMP	FijiCOMP	saliva	oral	0	control	M				SAMN02334393	9277916
SAMN02334394	FijiCOMP.M1.22	FijiCOMP.Village_1	HMP_FijiCOMP	FijiCOMP	saliva	oral	0	control	M				SAMN02334394	9875590
SAMN02334395	FijiCOMP.M1.23	FijiCOMP.Village_1	HMP_FijiCOMP	FijiCOMP	saliva	oral	0	control	M				SAMN02334395	4947532
SAMN02334397	FijiCOMP.M1.35	FijiCOMP.Village_1	HMP_FijiCOMP	FijiCOMP	saliva	oral	0	control	M				SAMN02334397	4779172
SAMN02334398	FijiCOMP.M1.44	FijiCOMP.Village_1	HMP_FijiCOMP	FijiCOMP	saliva	oral	0	control	M				SAMN02334398	6859984
SAMN02334402	FijiCOMP.W1.31	FijiCOMP.Village_4	HMP_FijiCOMP	FijiCOMP	saliva	oral	0	control	F				SAMN02334402	7303516
SAMN02334405	FijiCOMP.W2.36	FijiCOMP.Village_3	HMP_FijiCOMP	FijiCOMP	saliva	oral	0	control	F				SAMN02334405	19949530
SAMN02334406	FijiCOMP.WL.15	FijiCOMP.Village_2	HMP_FijiCOMP	FijiCOMP	saliva	oral	0	control	F				SAMN02334406	14395486
SAMN02334408	FijiCOMP.WL.28	FijiCOMP.Village_2	HMP_FijiCOMP	FijiCOMP	saliva	oral	0	control	F				SAMN02334408	13904094
SAMN02334409	FijiCOMP.W2.8	FijiCOMP.Village_3	HMP_FijiCOMP	FijiCOMP	saliva	oral	0	control	F				SAMN02334409	20059300
SAMN02334410	FijiCOMP.WL.2	FijiCOMP.Village_2	HMP_FijiCOMP	FijiCOMP	saliva	oral	0	control	F				SAMN02334410	17252974
SAMN02334413	FijiCOMP.M1.37	FijiCOMP.Village_1	HMP_FijiCOMP	FijiCOMP	saliva	oral	0	control	M				SAMN02334413	4965072
SAMN02334415	FijiCOMP.M1.48	FijiCOMP.Village_1	HMP_FijiCOMP	FijiCOMP	saliva	oral	0	control	M				SAMN02334415	6749750
SAMN02334416	FijiCOMP.M1.61	FijiCOMP.Village_1	HMP_FijiCOMP	FijiCOMP	saliva	oral	0	control	M				SAMN02334416	10772920
SAMN02334418	FijiCOMP.W1.36	FijiCOMP.Village_4	HMP_FijiCOMP	FijiCOMP	saliva	oral	0	control	F				SAMN02334418	18940832
SAMN02334419	FijiCOMP.W2.26	FijiCOMP.Village_3	HMP_FijiCOMP	FijiCOMP	saliva	oral	0	control	F				SAMN02334419	11749000
SAMN02334420	FijiCOMP.W2.39	FijiCOMP.Village_3	HMP_FijiCOMP	FijiCOMP	saliva	oral	0	control	F				SAMN02334420	16466202
SAMN02334421	FijiCOMP.W2.46	FijiCOMP.Village_3	HMP_FijiCOMP	FijiCOMP	saliva	oral	0	control	F				SAMN02334421	15307768
SAMN02334422	FijiCOMP.W2.53	FijiCOMP.Village_3	HMP_FijiCOMP	FijiCOMP	saliva	oral	0	control	F				SAMN02334422	8200036
SAMN02334424	FijiCOMP.WL.36	FijiCOMP.Village_2	HMP_FijiCOMP	FijiCOMP	saliva	oral	0	control	F				SAMN02334424	9149874
SAMN02334425	FijiCOMP.M1.6	FijiCOMP.Village_1	HMP_FijiCOMP	FijiCOMP	saliva	oral	0	control	M				SAMN02334425	4578736
SAMN02334428	FijiCOMP.M1.36	FijiCOMP.Village_1	HMP_FijiCOMP	FijiCOMP	saliva	oral	0	control	M				SAMN02334428	5778114
SAMN02334429	FijiCOMP.M1.38	FijiCOMP.Village_1	HMP_FijiCOMP	FijiCOMP	saliva	oral	0	control	M				SAMN02334429	10830390
SAMN02334432	FijiCOMP.W2.41	FijiCOMP.Village_3	HMP_FijiCOMP	FijiCOMP	saliva	oral	0	control	F				SAMN02334432	12152000
SAMN02334433	FijiCOMP.W2.45	FijiCOMP.Village_3	HMP_FijiCOMP	FijiCOMP	saliva	oral	0	control	F				SAMN02334433	12047844
SAMN02334434	FijiCOMP.W3.23	FijiCOMP.Village_3	HMP_FijiCOMP	FijiCOMP	saliva	oral	0	control	F				SAMN02334434	21029600
SAMN02334435	FijiCOMP.WL.12	FijiCOMP.Village_2	HMP_FijiCOMP	FijiCOMP	saliva	oral	0	control	F				SAMN02334435	6534914
SAMN02334436	FijiCOMP.WL.25	FijiCOMP.Village_2	HMP_FijiCOMP	FijiCOMP	saliva	oral	0	control	F				SAMN02334436	12233034
SAMN02334437	FijiCOMP.WL.30	FijiCOMP.Village_2	HMP_FijiCOMP	FijiCOMP	saliva	oral	0	control	F				SAMN02334437	16731776
